# Supplementary material for: CDK16 as a potential prognostic biomarker correlated with an immunosuppressive tumor microenvironment and benefits in enhancing the effectiveness of immunotherapy in human cancers
Source: publisher site journal article supplement (doi:10.18632/aging.205465), 2024-01-22
Supplement: Supplementary file [file aging-v16i2-205465-supplementary-material-SD1.pdf]

## SUPPLEMENTARY FIGURE

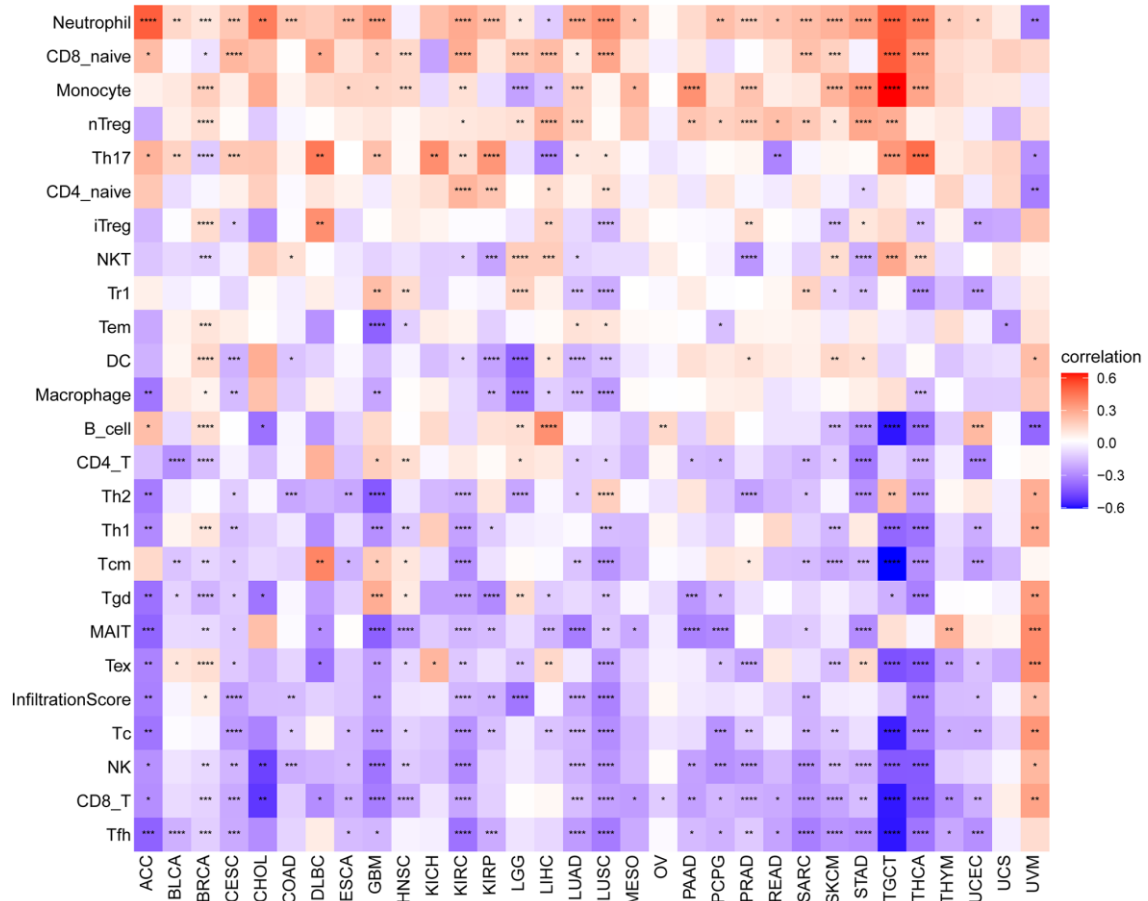

Supplementary Figure 1. Correlation between CDK16 and different immune cells from ImmuCellAI database.
