# Supplementary material for: CDK16 as a potential prognostic biomarker correlated with an immunosuppressive tumor microenvironment and benefits in enhancing the effectiveness of immunotherapy in human cancers
Source: Aging (Albany NY). 2024 Jan 22;16(2):1879–96. doi: 10.18632/aging.205465 (PMC10866429; doi:10.18632/aging.205465)
Supplement: Supplementary Table 1 [file aging-16-205465-s002.xlsx]

## Sheet: Sheet1
Supplementary Table 1. Expression of CDK16 in pan-cancer.
sample	tissue	type	tumor_type	tpm
TCGA.D3.A1QA.07	SKCM	SKCM_tumor_TCGA	tumor	6.1287
TCGA.DE.A4MD.06	THCA	THCA_tumor_TCGA	tumor	6.3365
TCGA.J8.A3O2.06	THCA	THCA_tumor_TCGA	tumor	6.0059
TCGA.J8.A3YH.06	THCA	THCA_tumor_TCGA	tumor	5.5227
TCGA.EM.A2P1.06	THCA	THCA_tumor_TCGA	tumor	5.61
TCGA.J8.A4HW.06	THCA	THCA_tumor_TCGA	tumor	6.5974
TCGA.EM.A2CS.06	THCA	THCA_tumor_TCGA	tumor	5.9832
TCGA.EM.A3SU.06	THCA	THCA_tumor_TCGA	tumor	5.8053
TCGA.EM.A3FQ.06	THCA	THCA_tumor_TCGA	tumor	6.131
TCGA.SI.A71O.06	SARC	SARC_tumor_TCGA	tumor	6.6078
TCGA.DA.A95Z.06	SKCM	SKCM_tumor_TCGA	tumor	6.2413
TCGA.EE.A29D.06	SKCM	SKCM_tumor_TCGA	tumor	6.644
TCGA.EE.A29V.06	SKCM	SKCM_tumor_TCGA	tumor	7.0907
TCGA.W3.AA1O.06	SKCM	SKCM_tumor_TCGA	tumor	6.1819
TCGA.EE.A2GJ.06	SKCM	SKCM_tumor_TCGA	tumor	5.9519
TCGA.3N.A9WC.06	SKCM	SKCM_tumor_TCGA	tumor	5.3089
TCGA.3N.A9WD.06	SKCM	SKCM_tumor_TCGA	tumor	5.615
TCGA.D9.A1JW.06	SKCM	SKCM_tumor_TCGA	tumor	6.1987
TCGA.EE.A2GC.06	SKCM	SKCM_tumor_TCGA	tumor	5.9989
TCGA.ER.A19F.06	SKCM	SKCM_tumor_TCGA	tumor	6.0288
TCGA.DA.A1IC.06	SKCM	SKCM_tumor_TCGA	tumor	6.7208
TCGA.EE.A2GP.06	SKCM	SKCM_tumor_TCGA	tumor	6.8291
TCGA.FS.A4F9.06	SKCM	SKCM_tumor_TCGA	tumor	6.6155
TCGA.EE.A20I.06	SKCM	SKCM_tumor_TCGA	tumor	7.283
TCGA.EE.A29S.06	SKCM	SKCM_tumor_TCGA	tumor	6.9083
TCGA.ER.A19A.06	SKCM	SKCM_tumor_TCGA	tumor	6.2288
TCGA.WE.A8K6.06	SKCM	SKCM_tumor_TCGA	tumor	6.9032
TCGA.EE.A29L.06	SKCM	SKCM_tumor_TCGA	tumor	6.2548
TCGA.EE.A29N.06	SKCM	SKCM_tumor_TCGA	tumor	6.2219
TCGA.EE.A2GR.06	SKCM	SKCM_tumor_TCGA	tumor	6.3868
TCGA.FR.A8YC.06	SKCM	SKCM_tumor_TCGA	tumor	6.1318
TCGA.GF.A6C9.06	SKCM	SKCM_tumor_TCGA	tumor	5.6725
TCGA.D3.A8GP.06	SKCM	SKCM_tumor_TCGA	tumor	6.2906
TCGA.EE.A2GT.06	SKCM	SKCM_tumor_TCGA	tumor	6.9229
TCGA.ER.A19C.06	SKCM	SKCM_tumor_TCGA	tumor	5.9746
TCGA.RP.A693.06	SKCM	SKCM_tumor_TCGA	tumor	6.4305
TCGA.D3.A2J9.06	SKCM	SKCM_tumor_TCGA	tumor	5.1835
TCGA.EE.A3JE.06	SKCM	SKCM_tumor_TCGA	tumor	5.0747
TCGA.YD.A9TA.06	SKCM	SKCM_tumor_TCGA	tumor	6.234
TCGA.D3.A2JF.06	SKCM	SKCM_tumor_TCGA	tumor	6.0609
TCGA.D3.A5GL.06	SKCM	SKCM_tumor_TCGA	tumor	6.5045
TCGA.FS.A1ZM.06	SKCM	SKCM_tumor_TCGA	tumor	6.5878
TCGA.WE.A8K1.06	SKCM	SKCM_tumor_TCGA	tumor	5.3862
TCGA.D3.A8GM.06	SKCM	SKCM_tumor_TCGA	tumor	6.9628
TCGA.EE.A2MC.06	SKCM	SKCM_tumor_TCGA	tumor	6.3005
TCGA.GN.A4U4.06	SKCM	SKCM_tumor_TCGA	tumor	5.1997
TCGA.QB.AA9O.06	SKCM	SKCM_tumor_TCGA	tumor	6.2745
TCGA.D3.A1Q9.06	SKCM	SKCM_tumor_TCGA	tumor	6.2451
TCGA.EE.A184.06	SKCM	SKCM_tumor_TCGA	tumor	5.8263
TCGA.EE.A2MS.06	SKCM	SKCM_tumor_TCGA	tumor	6.4572
TCGA.EE.A3J4.06	SKCM	SKCM_tumor_TCGA	tumor	5.5482
TCGA.3N.A9WB.06	SKCM	SKCM_tumor_TCGA	tumor	6.0005
TCGA.EB.A5UL.06	SKCM	SKCM_tumor_TCGA	tumor	6.8391
TCGA.EE.A2A2.06	SKCM	SKCM_tumor_TCGA	tumor	5.9043
TCGA.EE.A2MU.06	SKCM	SKCM_tumor_TCGA	tumor	7.164
TCGA.EE.A3J5.06	SKCM	SKCM_tumor_TCGA	tumor	6.5286
TCGA.FS.A1ZY.06	SKCM	SKCM_tumor_TCGA	tumor	5.3402
TCGA.GN.A4U9.06	SKCM	SKCM_tumor_TCGA	tumor	6.2679
TCGA.RP.A694.06	SKCM	SKCM_tumor_TCGA	tumor	5.8182
TCGA.W3.AA1R.06	SKCM	SKCM_tumor_TCGA	tumor	6.4516
TCGA.D3.A3ML.06	SKCM	SKCM_tumor_TCGA	tumor	5.5255
TCGA.D9.A6EA.06	SKCM	SKCM_tumor_TCGA	tumor	6.3145
TCGA.EE.A3JD.06	SKCM	SKCM_tumor_TCGA	tumor	5.7942
TCGA.GN.A8LK.06	SKCM	SKCM_tumor_TCGA	tumor	7.1794
TCGA.WE.A8JZ.06	SKCM	SKCM_tumor_TCGA	tumor	6.3404
TCGA.WE.A8ZM.06	SKCM	SKCM_tumor_TCGA	tumor	5.8133
TCGA.EE.A17Y.06	SKCM	SKCM_tumor_TCGA	tumor	5.8883
TCGA.EE.A180.06	SKCM	SKCM_tumor_TCGA	tumor	6.4128
TCGA.D3.A2JA.06	SKCM	SKCM_tumor_TCGA	tumor	6.4547
TCGA.D3.A2JH.06	SKCM	SKCM_tumor_TCGA	tumor	6.0693
TCGA.D3.A8GI.06	SKCM	SKCM_tumor_TCGA	tumor	8.2108
TCGA.DA.A95Y.06	SKCM	SKCM_tumor_TCGA	tumor	6.2574
TCGA.EE.A29A.06	SKCM	SKCM_tumor_TCGA	tumor	6.5057
TCGA.FS.A1ZK.06	SKCM	SKCM_tumor_TCGA	tumor	6.3011
TCGA.FW.A3R5.06	SKCM	SKCM_tumor_TCGA	tumor	6.6079
TCGA.D3.A2J7.06	SKCM	SKCM_tumor_TCGA	tumor	5.5844
TCGA.EE.A29B.06	SKCM	SKCM_tumor_TCGA	tumor	6.2823
TCGA.EE.A2GN.06	SKCM	SKCM_tumor_TCGA	tumor	5.961
TCGA.D3.A8GQ.06	SKCM	SKCM_tumor_TCGA	tumor	6.0007
TCGA.D9.A3Z1.06	SKCM	SKCM_tumor_TCGA	tumor	6.0607
TCGA.EE.A2M7.06	SKCM	SKCM_tumor_TCGA	tumor	6.1235
TCGA.EE.A2MH.06	SKCM	SKCM_tumor_TCGA	tumor	6.8092
TCGA.W3.A828.06	SKCM	SKCM_tumor_TCGA	tumor	6.6365
TCGA.D3.A2J6.06	SKCM	SKCM_tumor_TCGA	tumor	6.8244
TCGA.FS.A1ZW.06	SKCM	SKCM_tumor_TCGA	tumor	4.9978
TCGA.WE.A8K5.06	SKCM	SKCM_tumor_TCGA	tumor	6.1965
TCGA.D3.A1Q3.06	SKCM	SKCM_tumor_TCGA	tumor	6.0422
TCGA.FS.A4F4.06	SKCM	SKCM_tumor_TCGA	tumor	5.5662
TCGA.W3.AA1W.06	SKCM	SKCM_tumor_TCGA	tumor	6.6703
TCGA.D3.A3BZ.06	SKCM	SKCM_tumor_TCGA	tumor	6.5057
TCGA.D9.A1X3.06	SKCM	SKCM_tumor_TCGA	tumor	6.5668
TCGA.DA.A1I0.06	SKCM	SKCM_tumor_TCGA	tumor	7.005
TCGA.FS.A1ZD.06	SKCM	SKCM_tumor_TCGA	tumor	7.0007
TCGA.W3.AA1V.06	SKCM	SKCM_tumor_TCGA	tumor	6.3724
TCGA.DA.A1I7.06	SKCM	SKCM_tumor_TCGA	tumor	6.8509
TCGA.DA.A95X.06	SKCM	SKCM_tumor_TCGA	tumor	6.5998
TCGA.ER.A193.06	SKCM	SKCM_tumor_TCGA	tumor	6.8409
TCGA.FS.A1Z4.06	SKCM	SKCM_tumor_TCGA	tumor	7.0493
TCGA.WE.A8ZY.06	SKCM	SKCM_tumor_TCGA	tumor	7.1808
TCGA.YG.AA3O.06	SKCM	SKCM_tumor_TCGA	tumor	6.4816
TCGA.D3.A5GO.06	SKCM	SKCM_tumor_TCGA	tumor	6.4004
TCGA.EE.A2M6.06	SKCM	SKCM_tumor_TCGA	tumor	6.4634
TCGA.EE.A2MR.06	SKCM	SKCM_tumor_TCGA	tumor	5.7077
TCGA.D3.A1Q5.06	SKCM	SKCM_tumor_TCGA	tumor	6.7636
TCGA.D3.A51R.06	SKCM	SKCM_tumor_TCGA	tumor	5.8405
TCGA.EE.A2MJ.06	SKCM	SKCM_tumor_TCGA	tumor	6.2447
TCGA.GN.A264.06	SKCM	SKCM_tumor_TCGA	tumor	6.8189
TCGA.EE.A20C.06	SKCM	SKCM_tumor_TCGA	tumor	5.966
TCGA.EE.A3J8.06	SKCM	SKCM_tumor_TCGA	tumor	5.8084
TCGA.D3.A2JD.06	SKCM	SKCM_tumor_TCGA	tumor	6.9362
TCGA.D3.A5GS.06	SKCM	SKCM_tumor_TCGA	tumor	6.1165
TCGA.EE.A2MN.06	SKCM	SKCM_tumor_TCGA	tumor	5.6047
TCGA.ER.A1A1.06	SKCM	SKCM_tumor_TCGA	tumor	5.254
TCGA.Z2.AA3S.06	SKCM	SKCM_tumor_TCGA	tumor	5.889
TCGA.EE.A17Z.06	SKCM	SKCM_tumor_TCGA	tumor	6.6152
TCGA.FS.A1ZB.06	SKCM	SKCM_tumor_TCGA	tumor	6.4413
TCGA.W3.AA1Q.06	SKCM	SKCM_tumor_TCGA	tumor	5.6927
TCGA.WE.A8ZN.06	SKCM	SKCM_tumor_TCGA	tumor	5.8861
TCGA.D9.A6EC.06	SKCM	SKCM_tumor_TCGA	tumor	6.9862
TCGA.D9.A6EG.06	SKCM	SKCM_tumor_TCGA	tumor	6.5965
TCGA.EE.A20H.06	SKCM	SKCM_tumor_TCGA	tumor	7.5593
TCGA.ER.A19O.06	SKCM	SKCM_tumor_TCGA	tumor	7.8437
TCGA.D3.A1Q6.06	SKCM	SKCM_tumor_TCGA	tumor	7.2738
TCGA.D3.A1QA.06	SKCM	SKCM_tumor_TCGA	tumor	6.2691
TCGA.DA.A1I1.06	SKCM	SKCM_tumor_TCGA	tumor	6.7925
TCGA.DA.A3F2.06	SKCM	SKCM_tumor_TCGA	tumor	4.6916
TCGA.EB.A5KH.06	SKCM	SKCM_tumor_TCGA	tumor	6.4295
TCGA.EB.A6L9.06	SKCM	SKCM_tumor_TCGA	tumor	5.9184
TCGA.ER.A3EV.06	SKCM	SKCM_tumor_TCGA	tumor	6.0505
TCGA.FS.A1ZT.06	SKCM	SKCM_tumor_TCGA	tumor	6.1518
TCGA.D9.A4Z6.06	SKCM	SKCM_tumor_TCGA	tumor	6.6416
TCGA.EE.A17X.06	SKCM	SKCM_tumor_TCGA	tumor	7.4521
TCGA.EE.A29E.06	SKCM	SKCM_tumor_TCGA	tumor	7.1171
TCGA.EE.A3JH.06	SKCM	SKCM_tumor_TCGA	tumor	5.3569
TCGA.ER.A19J.06	SKCM	SKCM_tumor_TCGA	tumor	5.8359
TCGA.FS.A1ZS.06	SKCM	SKCM_tumor_TCGA	tumor	6.1169
TCGA.D3.A3MU.06	SKCM	SKCM_tumor_TCGA	tumor	6.196
TCGA.EE.A20F.06	SKCM	SKCM_tumor_TCGA	tumor	6.3863
TCGA.EE.A29G.06	SKCM	SKCM_tumor_TCGA	tumor	5.9775
TCGA.ER.A2NF.06	SKCM	SKCM_tumor_TCGA	tumor	5.4132
TCGA.GN.A265.06	SKCM	SKCM_tumor_TCGA	tumor	5.6186
TCGA.D3.A8GS.06	SKCM	SKCM_tumor_TCGA	tumor	5.9468
TCGA.DA.A3F3.06	SKCM	SKCM_tumor_TCGA	tumor	5.8871
TCGA.DA.A95W.06	SKCM	SKCM_tumor_TCGA	tumor	5.3965
TCGA.EB.A44R.06	SKCM	SKCM_tumor_TCGA	tumor	6.2424
TCGA.EE.A2MD.06	SKCM	SKCM_tumor_TCGA	tumor	6.3169
TCGA.FS.A1YW.06	SKCM	SKCM_tumor_TCGA	tumor	6.1853
TCGA.FS.A1ZP.06	SKCM	SKCM_tumor_TCGA	tumor	5.8001
TCGA.FS.A4F8.06	SKCM	SKCM_tumor_TCGA	tumor	6.3815
TCGA.D3.A51F.06	SKCM	SKCM_tumor_TCGA	tumor	5.4976
TCGA.D3.A51K.06	SKCM	SKCM_tumor_TCGA	tumor	6.0813
TCGA.DA.A1I4.06	SKCM	SKCM_tumor_TCGA	tumor	5.7019
TCGA.EE.A2GB.06	SKCM	SKCM_tumor_TCGA	tumor	6.5854
TCGA.EE.A2ME.06	SKCM	SKCM_tumor_TCGA	tumor	5.1639
TCGA.ER.A19T.06	SKCM	SKCM_tumor_TCGA	tumor	6.0845
TCGA.FS.A1ZC.06	SKCM	SKCM_tumor_TCGA	tumor	5.8975
TCGA.GN.A4U8.06	SKCM	SKCM_tumor_TCGA	tumor	5.5008
TCGA.EE.A3AD.06	SKCM	SKCM_tumor_TCGA	tumor	6.0751
TCGA.ER.A2NC.06	SKCM	SKCM_tumor_TCGA	tumor	6.602
TCGA.FR.A7U8.06	SKCM	SKCM_tumor_TCGA	tumor	5.5515
TCGA.EB.A5UN.06	SKCM	SKCM_tumor_TCGA	tumor	5.9593
TCGA.EE.A2M5.06	SKCM	SKCM_tumor_TCGA	tumor	6.7504
TCGA.ER.A2NH.06	SKCM	SKCM_tumor_TCGA	tumor	6.2485
TCGA.ER.A42L.06	SKCM	SKCM_tumor_TCGA	tumor	5.8605
TCGA.OD.A75X.06	SKCM	SKCM_tumor_TCGA	tumor	6.7378
TCGA.QB.A6FS.06	SKCM	SKCM_tumor_TCGA	tumor	5.9837
TCGA.WE.A8ZR.06	SKCM	SKCM_tumor_TCGA	tumor	6.3997
TCGA.D3.A2J8.06	SKCM	SKCM_tumor_TCGA	tumor	6.6511
TCGA.D3.A8GB.06	SKCM	SKCM_tumor_TCGA	tumor	6.53
TCGA.D3.A8GC.06	SKCM	SKCM_tumor_TCGA	tumor	6.3997
TCGA.EE.A183.06	SKCM	SKCM_tumor_TCGA	tumor	6.6048
TCGA.EE.A3JI.06	SKCM	SKCM_tumor_TCGA	tumor	6.3279
TCGA.WE.A8ZQ.06	SKCM	SKCM_tumor_TCGA	tumor	6.5802
TCGA.D3.A3MO.06	SKCM	SKCM_tumor_TCGA	tumor	6.5862
TCGA.EE.A3AA.06	SKCM	SKCM_tumor_TCGA	tumor	6.9709
TCGA.EE.A3AC.06	SKCM	SKCM_tumor_TCGA	tumor	6.3358
TCGA.ER.A19N.06	SKCM	SKCM_tumor_TCGA	tumor	5.3985
TCGA.WE.AAA0.06	SKCM	SKCM_tumor_TCGA	tumor	5.9935
TCGA.EE.A2A1.06	SKCM	SKCM_tumor_TCGA	tumor	5.4108
TCGA.ER.A195.06	SKCM	SKCM_tumor_TCGA	tumor	6.0575
TCGA.D3.A8GK.06	SKCM	SKCM_tumor_TCGA	tumor	6.4221
TCGA.DA.A1I2.06	SKCM	SKCM_tumor_TCGA	tumor	7.2152
TCGA.DA.A3F5.06	SKCM	SKCM_tumor_TCGA	tumor	7.8667
TCGA.EE.A2MT.06	SKCM	SKCM_tumor_TCGA	tumor	6.1811
TCGA.ER.A198.06	SKCM	SKCM_tumor_TCGA	tumor	6.1233
TCGA.GN.A266.06	SKCM	SKCM_tumor_TCGA	tumor	6.1904
TCGA.WE.A8ZX.06	SKCM	SKCM_tumor_TCGA	tumor	6.5067
TCGA.EE.A2GE.06	SKCM	SKCM_tumor_TCGA	tumor	5.9579
TCGA.EE.A3JA.06	SKCM	SKCM_tumor_TCGA	tumor	5.1478
TCGA.FR.A3YN.06	SKCM	SKCM_tumor_TCGA	tumor	5.7007
TCGA.D3.A8GL.06	SKCM	SKCM_tumor_TCGA	tumor	6.4686
TCGA.EE.A2A5.06	SKCM	SKCM_tumor_TCGA	tumor	5.5302
TCGA.EE.A2A6.06	SKCM	SKCM_tumor_TCGA	tumor	5.8699
TCGA.EE.A2MI.06	SKCM	SKCM_tumor_TCGA	tumor	7.0631
TCGA.EE.A3J7.06	SKCM	SKCM_tumor_TCGA	tumor	6.6935
TCGA.D3.A3MR.06	SKCM	SKCM_tumor_TCGA	tumor	5.6648
TCGA.DA.A1HY.06	SKCM	SKCM_tumor_TCGA	tumor	7.204
TCGA.EE.A29W.06	SKCM	SKCM_tumor_TCGA	tumor	6.3047
TCGA.EE.A3J3.06	SKCM	SKCM_tumor_TCGA	tumor	6.4341
TCGA.ER.A19B.06	SKCM	SKCM_tumor_TCGA	tumor	6.4867
TCGA.FR.A8YE.06	SKCM	SKCM_tumor_TCGA	tumor	5.789
TCGA.D9.A148.06	SKCM	SKCM_tumor_TCGA	tumor	6.1567
TCGA.ER.A19H.06	SKCM	SKCM_tumor_TCGA	tumor	6.2724
TCGA.FS.A1ZE.06	SKCM	SKCM_tumor_TCGA	tumor	6.0822
TCGA.D3.A3CB.06	SKCM	SKCM_tumor_TCGA	tumor	5.7798
TCGA.DA.A3F8.06	SKCM	SKCM_tumor_TCGA	tumor	5.9055
TCGA.EE.A2GI.06	SKCM	SKCM_tumor_TCGA	tumor	6.5615
TCGA.ER.A2NE.06	SKCM	SKCM_tumor_TCGA	tumor	6.4624
TCGA.FS.A4FD.06	SKCM	SKCM_tumor_TCGA	tumor	5.2407
TCGA.GN.A267.06	SKCM	SKCM_tumor_TCGA	tumor	5.0837
TCGA.D3.A2JP.06	SKCM	SKCM_tumor_TCGA	tumor	5.8595
TCGA.WE.AA9Y.06	SKCM	SKCM_tumor_TCGA	tumor	6.6823
TCGA.D3.A5GU.06	SKCM	SKCM_tumor_TCGA	tumor	6.5823
TCGA.ER.A19M.06	SKCM	SKCM_tumor_TCGA	tumor	6.0828
TCGA.FS.A1ZR.06	SKCM	SKCM_tumor_TCGA	tumor	5.9388
TCGA.EE.A2ML.06	SKCM	SKCM_tumor_TCGA	tumor	7.058
TCGA.ER.A19L.06	SKCM	SKCM_tumor_TCGA	tumor	6.042
TCGA.EE.A2GH.06	SKCM	SKCM_tumor_TCGA	tumor	5.3772
TCGA.D3.A1Q8.06	SKCM	SKCM_tumor_TCGA	tumor	6.4228
TCGA.FS.A1ZQ.06	SKCM	SKCM_tumor_TCGA	tumor	7.9524
TCGA.EE.A3AB.06	SKCM	SKCM_tumor_TCGA	tumor	6.3773
TCGA.EE.A3AH.06	SKCM	SKCM_tumor_TCGA	tumor	7.2767
TCGA.ER.A3PL.06	SKCM	SKCM_tumor_TCGA	tumor	6.0043
TCGA.GN.A4U3.06	SKCM	SKCM_tumor_TCGA	tumor	6.4055
TCGA.D3.A8GE.06	SKCM	SKCM_tumor_TCGA	tumor	6.4507
TCGA.W3.AA21.06	SKCM	SKCM_tumor_TCGA	tumor	6.2778
TCGA.D3.A8GV.06	SKCM	SKCM_tumor_TCGA	tumor	6.9595
TCGA.EE.A3AG.06	SKCM	SKCM_tumor_TCGA	tumor	6.8314
TCGA.ER.A3ES.06	SKCM	SKCM_tumor_TCGA	tumor	4.9658
TCGA.D3.A2JK.06	SKCM	SKCM_tumor_TCGA	tumor	7.1664
TCGA.EE.A2MG.06	SKCM	SKCM_tumor_TCGA	tumor	6.4621
TCGA.EE.A29C.06	SKCM	SKCM_tumor_TCGA	tumor	7.4941
TCGA.D3.A51J.06	SKCM	SKCM_tumor_TCGA	tumor	5.6837
TCGA.FS.A1Z7.06	SKCM	SKCM_tumor_TCGA	tumor	6.2583
TCGA.D3.A8GJ.06	SKCM	SKCM_tumor_TCGA	tumor	5.4539
TCGA.D3.A3C1.06	SKCM	SKCM_tumor_TCGA	tumor	6.8862
TCGA.D3.A51G.06	SKCM	SKCM_tumor_TCGA	tumor	6.6683
TCGA.RP.A695.06	SKCM	SKCM_tumor_TCGA	tumor	6.6099
TCGA.ER.A199.06	SKCM	SKCM_tumor_TCGA	tumor	5.6171
TCGA.EE.A182.06	SKCM	SKCM_tumor_TCGA	tumor	7.6288
TCGA.WE.AAA3.06	SKCM	SKCM_tumor_TCGA	tumor	5.9329
TCGA.DA.A95V.06	SKCM	SKCM_tumor_TCGA	tumor	6.1591
TCGA.ER.A197.06	SKCM	SKCM_tumor_TCGA	tumor	6.0586
TCGA.GN.A268.06	SKCM	SKCM_tumor_TCGA	tumor	6.5113
TCGA.EE.A181.06	SKCM	SKCM_tumor_TCGA	tumor	6.3782
TCGA.ER.A19S.06	SKCM	SKCM_tumor_TCGA	tumor	5.8922
TCGA.D9.A1JX.06	SKCM	SKCM_tumor_TCGA	tumor	6.3142
TCGA.D3.A1Q1.06	SKCM	SKCM_tumor_TCGA	tumor	4.9533
TCGA.FS.A1ZF.06	SKCM	SKCM_tumor_TCGA	tumor	6.4009
TCGA.EE.A2A0.06	SKCM	SKCM_tumor_TCGA	tumor	5.1835
TCGA.FS.A4F5.06	SKCM	SKCM_tumor_TCGA	tumor	6.3782
TCGA.D3.A1QB.06	SKCM	SKCM_tumor_TCGA	tumor	5.5512
TCGA.D3.A2JE.06	SKCM	SKCM_tumor_TCGA	tumor	6.9224
TCGA.D9.A6E9.06	SKCM	SKCM_tumor_TCGA	tumor	6.0685
TCGA.DA.A1HV.06	SKCM	SKCM_tumor_TCGA	tumor	6.5835
TCGA.FS.A1ZJ.06	SKCM	SKCM_tumor_TCGA	tumor	6.8869
TCGA.FS.A4FC.06	SKCM	SKCM_tumor_TCGA	tumor	6.73
TCGA.D3.A3CE.06	SKCM	SKCM_tumor_TCGA	tumor	6.2292
TCGA.EB.A5VV.06	SKCM	SKCM_tumor_TCGA	tumor	4.6468
TCGA.GF.A4EO.06	SKCM	SKCM_tumor_TCGA	tumor	5.3202
TCGA.EE.A29P.06	SKCM	SKCM_tumor_TCGA	tumor	6.1102
TCGA.WE.A8ZO.06	SKCM	SKCM_tumor_TCGA	tumor	5.7568
TCGA.FS.A1Z3.06	SKCM	SKCM_tumor_TCGA	tumor	6.2739
TCGA.FW.A3TU.06	SKCM	SKCM_tumor_TCGA	tumor	7.2853
TCGA.GN.A26D.06	SKCM	SKCM_tumor_TCGA	tumor	6.9988
TCGA.FS.A1ZH.06	SKCM	SKCM_tumor_TCGA	tumor	6.6597
TCGA.D3.A2JB.06	SKCM	SKCM_tumor_TCGA	tumor	5.4935
TCGA.EE.A29Q.06	SKCM	SKCM_tumor_TCGA	tumor	6.115
TCGA.EE.A2GM.06	SKCM	SKCM_tumor_TCGA	tumor	6.2081
TCGA.EE.A2MQ.06	SKCM	SKCM_tumor_TCGA	tumor	6.7009
TCGA.FS.A1ZU.06	SKCM	SKCM_tumor_TCGA	tumor	5.1498
TCGA.D3.A3CC.06	SKCM	SKCM_tumor_TCGA	tumor	5.8309
TCGA.DA.A1IB.06	SKCM	SKCM_tumor_TCGA	tumor	5.0505
TCGA.GN.A8LL.06	SKCM	SKCM_tumor_TCGA	tumor	6.505
TCGA.FS.A4F0.06	SKCM	SKCM_tumor_TCGA	tumor	6.9653
TCGA.EE.A20B.06	SKCM	SKCM_tumor_TCGA	tumor	6.3537
TCGA.EE.A2GO.06	SKCM	SKCM_tumor_TCGA	tumor	5.9577
TCGA.RP.A690.06	SKCM	SKCM_tumor_TCGA	tumor	5.5482
TCGA.D9.A149.06	SKCM	SKCM_tumor_TCGA	tumor	6.5372
TCGA.EE.A2GU.06	SKCM	SKCM_tumor_TCGA	tumor	6.5378
TCGA.FR.A7UA.06	SKCM	SKCM_tumor_TCGA	tumor	5.4877
TCGA.ER.A3ET.06	SKCM	SKCM_tumor_TCGA	tumor	6.8885
TCGA.D3.A8GD.06	SKCM	SKCM_tumor_TCGA	tumor	6.7759
TCGA.DA.A1I8.06	SKCM	SKCM_tumor_TCGA	tumor	7.4365
TCGA.EE.A2MM.06	SKCM	SKCM_tumor_TCGA	tumor	6.6618
TCGA.FR.A7U9.06	SKCM	SKCM_tumor_TCGA	tumor	7.2184
TCGA.GN.A26A.06	SKCM	SKCM_tumor_TCGA	tumor	6.9679
TCGA.YG.AA3P.06	SKCM	SKCM_tumor_TCGA	tumor	6.1948
TCGA.GF.A6C8.06	SKCM	SKCM_tumor_TCGA	tumor	6.8342
TCGA.D3.A3CF.06	SKCM	SKCM_tumor_TCGA	tumor	5.8397
TCGA.EB.A5SH.06	SKCM	SKCM_tumor_TCGA	tumor	6.7654
TCGA.EE.A3JB.06	SKCM	SKCM_tumor_TCGA	tumor	6.7277
TCGA.FS.A1ZG.06	SKCM	SKCM_tumor_TCGA	tumor	6.4053
TCGA.W3.A825.06	SKCM	SKCM_tumor_TCGA	tumor	6.8714
TCGA.D3.A51T.06	SKCM	SKCM_tumor_TCGA	tumor	6.1054
TCGA.EE.A29H.06	SKCM	SKCM_tumor_TCGA	tumor	6.9082
TCGA.FW.A3I3.06	SKCM	SKCM_tumor_TCGA	tumor	6.5073
TCGA.GN.A9SD.06	SKCM	SKCM_tumor_TCGA	tumor	5.7727
TCGA.D3.A3C8.06	SKCM	SKCM_tumor_TCGA	tumor	5.6162
TCGA.EE.A29X.06	SKCM	SKCM_tumor_TCGA	tumor	7.3332
TCGA.EE.A2GD.06	SKCM	SKCM_tumor_TCGA	tumor	6.6313
TCGA.GF.A3OT.06	SKCM	SKCM_tumor_TCGA	tumor	6.4804
TCGA.D3.A3C7.06	SKCM	SKCM_tumor_TCGA	tumor	6.6121
TCGA.EB.A5SG.06	SKCM	SKCM_tumor_TCGA	tumor	5.3548
TCGA.ER.A2ND.06	SKCM	SKCM_tumor_TCGA	tumor	6.7617
TCGA.FW.A3TV.06	SKCM	SKCM_tumor_TCGA	tumor	6.5141
TCGA.Z2.AA3V.06	SKCM	SKCM_tumor_TCGA	tumor	7.6143
TCGA.D3.A51N.06	SKCM	SKCM_tumor_TCGA	tumor	5.7968
TCGA.FR.A8YD.06	SKCM	SKCM_tumor_TCGA	tumor	6.2921
TCGA.GN.A4U7.06	SKCM	SKCM_tumor_TCGA	tumor	7.0618
TCGA.WE.AAA4.06	SKCM	SKCM_tumor_TCGA	tumor	6.3946
TCGA.EE.A185.06	SKCM	SKCM_tumor_TCGA	tumor	6.4842
TCGA.FS.A1YY.06	SKCM	SKCM_tumor_TCGA	tumor	6.8126
TCGA.D3.A3C6.06	SKCM	SKCM_tumor_TCGA	tumor	6.8193
TCGA.D3.A8GR.06	SKCM	SKCM_tumor_TCGA	tumor	5.403
TCGA.EE.A2M8.06	SKCM	SKCM_tumor_TCGA	tumor	5.5522
TCGA.FS.A1ZZ.06	SKCM	SKCM_tumor_TCGA	tumor	5.765
TCGA.XV.AB01.06	SKCM	SKCM_tumor_TCGA	tumor	6.2138
TCGA.D3.A1Q4.06	SKCM	SKCM_tumor_TCGA	tumor	6.1371
TCGA.D3.A2JC.06	SKCM	SKCM_tumor_TCGA	tumor	6.7237
TCGA.EE.A3AE.06	SKCM	SKCM_tumor_TCGA	tumor	6.1212
TCGA.EB.A44Q.06	SKCM	SKCM_tumor_TCGA	tumor	6.3649
TCGA.EE.A29T.06	SKCM	SKCM_tumor_TCGA	tumor	6.2629
TCGA.D3.A2JO.06	SKCM	SKCM_tumor_TCGA	tumor	6.1807
TCGA.HR.A2OG.06	SKCM	SKCM_tumor_TCGA	tumor	5.9484
TCGA.EE.A29R.06	SKCM	SKCM_tumor_TCGA	tumor	6.7447
TCGA.EE.A3AF.06	SKCM	SKCM_tumor_TCGA	tumor	7.1476
TCGA.ER.A19G.06	SKCM	SKCM_tumor_TCGA	tumor	6.9061
TCGA.ER.A19W.06	SKCM	SKCM_tumor_TCGA	tumor	6.0414
TCGA.FW.A5DY.06	SKCM	SKCM_tumor_TCGA	tumor	5.4216
TCGA.ER.A19P.06	SKCM	SKCM_tumor_TCGA	tumor	5.9019
TCGA.GN.A262.06	SKCM	SKCM_tumor_TCGA	tumor	6.3051
TCGA.D3.A2JN.06	SKCM	SKCM_tumor_TCGA	tumor	6.7324
TCGA.EE.A2GK.06	SKCM	SKCM_tumor_TCGA	tumor	5.3162
TCGA.ER.A19D.06	SKCM	SKCM_tumor_TCGA	tumor	5.812
TCGA.FS.A4F2.06	SKCM	SKCM_tumor_TCGA	tumor	6.3837
TCGA.FS.A4FB.06	SKCM	SKCM_tumor_TCGA	tumor	6.9046
TCGA.HR.A2OH.06	SKCM	SKCM_tumor_TCGA	tumor	5.9706
TCGA.FS.A1ZA.06	SKCM	SKCM_tumor_TCGA	tumor	6.8453
TCGA.D3.A2JL.06	SKCM	SKCM_tumor_TCGA	tumor	6.0188
TCGA.ER.A2NG.06	SKCM	SKCM_tumor_TCGA	tumor	6.8316
TCGA.YD.A89C.06	SKCM	SKCM_tumor_TCGA	tumor	6.2359
TCGA.D3.A1Q7.06	SKCM	SKCM_tumor_TCGA	tumor	5.8329
TCGA.Z2.A8RT.06	SKCM	SKCM_tumor_TCGA	tumor	7.2048
TCGA.BF.AAP0.06	SKCM	SKCM_tumor_TCGA	tumor	6.2415
TCGA.EE.A2GL.06	SKCM	SKCM_tumor_TCGA	tumor	6.0708
TCGA.ER.A42K.06	SKCM	SKCM_tumor_TCGA	tumor	7.0724
TCGA.D3.A51E.06	SKCM	SKCM_tumor_TCGA	tumor	5.4715
TCGA.D9.A3Z3.06	SKCM	SKCM_tumor_TCGA	tumor	6.4679
TCGA.EE.A2MF.06	SKCM	SKCM_tumor_TCGA	tumor	6.1246
TCGA.FS.A1YX.06	SKCM	SKCM_tumor_TCGA	tumor	6.5551
TCGA.D3.A3MV.06	SKCM	SKCM_tumor_TCGA	tumor	6.2495
TCGA.FR.A729.06	SKCM	SKCM_tumor_TCGA	tumor	6.595
TCGA.DA.A1HW.06	SKCM	SKCM_tumor_TCGA	tumor	6.2941
TCGA.ER.A19Q.06	SKCM	SKCM_tumor_TCGA	tumor	6.5463
TCGA.ER.A19E.06	SKCM	SKCM_tumor_TCGA	tumor	6.7042
TCGA.EE.A2MP.06	SKCM	SKCM_tumor_TCGA	tumor	6.6591
TCGA.FR.A69P.06	SKCM	SKCM_tumor_TCGA	tumor	5.4935
TCGA.EE.A29M.06	SKCM	SKCM_tumor_TCGA	tumor	6.3212
TCGA.DA.A1IA.06	SKCM	SKCM_tumor_TCGA	tumor	7.1257
TCGA.FS.A1Z0.06	SKCM	SKCM_tumor_TCGA	tumor	6.0293
TCGA.D3.A2JG.06	SKCM	SKCM_tumor_TCGA	tumor	6.2089
TCGA.FR.A44A.06	SKCM	SKCM_tumor_TCGA	tumor	6.0832
TCGA.EE.A2GS.06	SKCM	SKCM_tumor_TCGA	tumor	5.7711
TCGA.D3.A8GN.06	SKCM	SKCM_tumor_TCGA	tumor	5.1281
TCGA.DA.A1I5.06	SKCM	SKCM_tumor_TCGA	tumor	6.1023
TCGA.WE.A8ZT.06	SKCM	SKCM_tumor_TCGA	tumor	6.3906
TCGA.LH.A9QB.06	SKCM	SKCM_tumor_TCGA	tumor	6.4275
TCGA.D3.A5GR.06	SKCM	SKCM_tumor_TCGA	tumor	7.295
TCGA.EE.A2MK.06	SKCM	SKCM_tumor_TCGA	tumor	6.1033
TCGA.D3.A5GN.06	SKCM	SKCM_tumor_TCGA	tumor	7.1197
TCGA.D3.A3C3.06	SKCM	SKCM_tumor_TCGA	tumor	7.2636
TCGA.D3.A8GO.06	SKCM	SKCM_tumor_TCGA	tumor	6.4562
TCGA.FR.A3YO.06	SKCM	SKCM_tumor_TCGA	tumor	7.7085
TCGA.RP.A6K9.06	SKCM	SKCM_tumor_TCGA	tumor	6.7278
TCGA.YD.A9TB.06	SKCM	SKCM_tumor_TCGA	tumor	6.6385
TCGA.V1.A9O5.06	PRAD	PRAD_tumor_TCGA	tumor	6.8356
TCGA.RW.A686.06	PCPG	PCPG_tumor_TCGA	tumor	5.1899
TCGA.SR.A6MX.06	PCPG	PCPG_tumor_TCGA	tumor	6.5543
TCGA.HZ.A9TJ.06	PAAD	PAAD_tumor_TCGA	tumor	5.2928
TCGA.UF.A71A.06	HNSC	HNSC_tumor_TCGA	tumor	6.9576
TCGA.KU.A6H7.06	HNSC	HNSC_tumor_TCGA	tumor	5.7578
TCGA.V5.A7RC.06	ESCA	ESCA_tumor_TCGA	tumor	7.391
TCGA.NH.A8F7.06	COAD	COAD_tumor_TCGA	tumor	6.3702
TCGA.UC.A7PG.06	CESC	CESC_tumor_TCGA	tumor	6.2491
TCGA.HM.A6W2.06	CESC	CESC_tumor_TCGA	tumor	6.9985
TCGA.E2.A15K.06	BRCA	BRCA_tumor_TCGA	tumor	6.0995
TCGA.AC.A6IX.06	BRCA	BRCA_tumor_TCGA	tumor	6.3054
TCGA.BH.A18V.06	BRCA	BRCA_tumor_TCGA	tumor	6.8217
TCGA.E2.A15A.06	BRCA	BRCA_tumor_TCGA	tumor	7.2737
TCGA.E2.A15E.06	BRCA	BRCA_tumor_TCGA	tumor	6.7467
TCGA.BH.A1ES.06	BRCA	BRCA_tumor_TCGA	tumor	6.4604
TCGA.BH.A1FE.06	BRCA	BRCA_tumor_TCGA	tumor	6.7545
TCGA.2G.AAGI.05	TGCT	TGCT_tumor_TCGA	tumor	5.3505
TCGA.2G.AAHP.05	TGCT	TGCT_tumor_TCGA	tumor	4.773
TCGA.2G.AAFG.05	TGCT	TGCT_tumor_TCGA	tumor	5.5913
TCGA.2G.AAGY.05	TGCT	TGCT_tumor_TCGA	tumor	5.7756
TCGA.2G.AAKG.05	TGCT	TGCT_tumor_TCGA	tumor	5.0099
TCGA.2G.AAKO.05	TGCT	TGCT_tumor_TCGA	tumor	5.3865
TCGA.SR.A6MX.05	PCPG	PCPG_tumor_TCGA	tumor	6.1192
TCGA.QR.A6GZ.05	PCPG	PCPG_tumor_TCGA	tumor	5.4957
TCGA.P7.A5NY.05	PCPG	PCPG_tumor_TCGA	tumor	5.9887
TCGA.UZ.A9PS.05	KIRP	KIRP_tumor_TCGA	tumor	5.9716
TCGA.DV.A4W0.05	KIRC	KIRC_tumor_TCGA	tumor	6.2743
TCGA.AB.2811.03	LAML	LAML_tumor_TCGA	tumor	7.6914
TCGA.AB.2908.03	LAML	LAML_tumor_TCGA	tumor	5.6375
TCGA.AB.2813.03	LAML	LAML_tumor_TCGA	tumor	5.8349
TCGA.AB.2805.03	LAML	LAML_tumor_TCGA	tumor	5.1993
TCGA.AB.2833.03	LAML	LAML_tumor_TCGA	tumor	5.2107
TCGA.AB.2843.03	LAML	LAML_tumor_TCGA	tumor	5.714
TCGA.AB.2868.03	LAML	LAML_tumor_TCGA	tumor	5.2273
TCGA.AB.2820.03	LAML	LAML_tumor_TCGA	tumor	5.753
TCGA.AB.2861.03	LAML	LAML_tumor_TCGA	tumor	6.297
TCGA.AB.2870.03	LAML	LAML_tumor_TCGA	tumor	5.7474
TCGA.AB.2938.03	LAML	LAML_tumor_TCGA	tumor	5.5747
TCGA.AB.2865.03	LAML	LAML_tumor_TCGA	tumor	5.7372
TCGA.AB.2931.03	LAML	LAML_tumor_TCGA	tumor	6.2373
TCGA.AB.2840.03	LAML	LAML_tumor_TCGA	tumor	5.6436
TCGA.AB.2996.03	LAML	LAML_tumor_TCGA	tumor	5.466
TCGA.AB.2941.03	LAML	LAML_tumor_TCGA	tumor	6.7178
TCGA.AB.2939.03	LAML	LAML_tumor_TCGA	tumor	5.9021
TCGA.AB.2885.03	LAML	LAML_tumor_TCGA	tumor	5.8664
TCGA.AB.2959.03	LAML	LAML_tumor_TCGA	tumor	5.4229
TCGA.AB.2900.03	LAML	LAML_tumor_TCGA	tumor	6.3257
TCGA.AB.2890.03	LAML	LAML_tumor_TCGA	tumor	5.6691
TCGA.AB.3002.03	LAML	LAML_tumor_TCGA	tumor	6.4
TCGA.AB.2838.03	LAML	LAML_tumor_TCGA	tumor	5.4446
TCGA.AB.2866.03	LAML	LAML_tumor_TCGA	tumor	6.4483
TCGA.AB.2948.03	LAML	LAML_tumor_TCGA	tumor	5.7159
TCGA.AB.2935.03	LAML	LAML_tumor_TCGA	tumor	5.9549
TCGA.AB.2822.03	LAML	LAML_tumor_TCGA	tumor	4.9755
TCGA.AB.2842.03	LAML	LAML_tumor_TCGA	tumor	4.9631
TCGA.AB.2904.03	LAML	LAML_tumor_TCGA	tumor	5.6068
TCGA.AB.2934.03	LAML	LAML_tumor_TCGA	tumor	6.011
TCGA.AB.2817.03	LAML	LAML_tumor_TCGA	tumor	5.6109
TCGA.AB.2821.03	LAML	LAML_tumor_TCGA	tumor	5.8617
TCGA.AB.2844.03	LAML	LAML_tumor_TCGA	tumor	5.6542
TCGA.AB.2856.03	LAML	LAML_tumor_TCGA	tumor	5.8087
TCGA.AB.2863.03	LAML	LAML_tumor_TCGA	tumor	5.1111
TCGA.AB.2912.03	LAML	LAML_tumor_TCGA	tumor	5.1748
TCGA.AB.2995.03	LAML	LAML_tumor_TCGA	tumor	5.6525
TCGA.AB.2848.03	LAML	LAML_tumor_TCGA	tumor	6.2527
TCGA.AB.2932.03	LAML	LAML_tumor_TCGA	tumor	6.329
TCGA.AB.2999.03	LAML	LAML_tumor_TCGA	tumor	5.427
TCGA.AB.2913.03	LAML	LAML_tumor_TCGA	tumor	4.8851
TCGA.AB.2956.03	LAML	LAML_tumor_TCGA	tumor	6.1052
TCGA.AB.3006.03	LAML	LAML_tumor_TCGA	tumor	5.6946
TCGA.AB.2883.03	LAML	LAML_tumor_TCGA	tumor	4.7394
TCGA.AB.2965.03	LAML	LAML_tumor_TCGA	tumor	5.1863
TCGA.AB.2874.03	LAML	LAML_tumor_TCGA	tumor	5.4693
TCGA.AB.2924.03	LAML	LAML_tumor_TCGA	tumor	5.8834
TCGA.AB.2933.03	LAML	LAML_tumor_TCGA	tumor	4.5675
TCGA.AB.2949.03	LAML	LAML_tumor_TCGA	tumor	5.3158
TCGA.AB.2967.03	LAML	LAML_tumor_TCGA	tumor	4.9393
TCGA.AB.2925.03	LAML	LAML_tumor_TCGA	tumor	6.2313
TCGA.AB.2963.03	LAML	LAML_tumor_TCGA	tumor	5.1465
TCGA.AB.2828.03	LAML	LAML_tumor_TCGA	tumor	5.1748
TCGA.AB.2889.03	LAML	LAML_tumor_TCGA	tumor	5.1776
TCGA.AB.2969.03	LAML	LAML_tumor_TCGA	tumor	5.432
TCGA.AB.2857.03	LAML	LAML_tumor_TCGA	tumor	6.2677
TCGA.AB.2975.03	LAML	LAML_tumor_TCGA	tumor	5.7309
TCGA.AB.2847.03	LAML	LAML_tumor_TCGA	tumor	5.5364
TCGA.AB.2976.03	LAML	LAML_tumor_TCGA	tumor	4.9964
TCGA.AB.3012.03	LAML	LAML_tumor_TCGA	tumor	6.0811
TCGA.AB.2853.03	LAML	LAML_tumor_TCGA	tumor	4.917
TCGA.AB.2871.03	LAML	LAML_tumor_TCGA	tumor	5.5448
TCGA.AB.2990.03	LAML	LAML_tumor_TCGA	tumor	5.5027
TCGA.AB.2980.03	LAML	LAML_tumor_TCGA	tumor	5.4142
TCGA.AB.2815.03	LAML	LAML_tumor_TCGA	tumor	5.3643
TCGA.AB.2835.03	LAML	LAML_tumor_TCGA	tumor	6.1441
TCGA.AB.2944.03	LAML	LAML_tumor_TCGA	tumor	5.5021
TCGA.AB.2806.03	LAML	LAML_tumor_TCGA	tumor	5.2608
TCGA.AB.2824.03	LAML	LAML_tumor_TCGA	tumor	5.2231
TCGA.AB.2893.03	LAML	LAML_tumor_TCGA	tumor	5.7219
TCGA.AB.2983.03	LAML	LAML_tumor_TCGA	tumor	5.2407
TCGA.AB.3005.03	LAML	LAML_tumor_TCGA	tumor	5.7931
TCGA.AB.2920.03	LAML	LAML_tumor_TCGA	tumor	6.4594
TCGA.AB.2875.03	LAML	LAML_tumor_TCGA	tumor	5.8253
TCGA.AB.2872.03	LAML	LAML_tumor_TCGA	tumor	6.0235
TCGA.AB.2891.03	LAML	LAML_tumor_TCGA	tumor	6.2147
TCGA.AB.2946.03	LAML	LAML_tumor_TCGA	tumor	5.511
TCGA.AB.2859.03	LAML	LAML_tumor_TCGA	tumor	5.7832
TCGA.AB.2849.03	LAML	LAML_tumor_TCGA	tumor	4.9584
TCGA.AB.2984.03	LAML	LAML_tumor_TCGA	tumor	5.7093
TCGA.AB.2836.03	LAML	LAML_tumor_TCGA	tumor	6.0736
TCGA.AB.2940.03	LAML	LAML_tumor_TCGA	tumor	5.7801
TCGA.AB.3007.03	LAML	LAML_tumor_TCGA	tumor	5.8902
TCGA.AB.2834.03	LAML	LAML_tumor_TCGA	tumor	5.6494
TCGA.AB.2901.03	LAML	LAML_tumor_TCGA	tumor	6.0295
TCGA.AB.2886.03	LAML	LAML_tumor_TCGA	tumor	6.1175
TCGA.AB.2994.03	LAML	LAML_tumor_TCGA	tumor	6.3752
TCGA.AB.3000.03	LAML	LAML_tumor_TCGA	tumor	6.0459
TCGA.AB.2880.03	LAML	LAML_tumor_TCGA	tumor	5.936
TCGA.AB.2808.03	LAML	LAML_tumor_TCGA	tumor	4.986
TCGA.AB.3009.03	LAML	LAML_tumor_TCGA	tumor	5.9286
TCGA.AB.3008.03	LAML	LAML_tumor_TCGA	tumor	6.029
TCGA.AB.2855.03	LAML	LAML_tumor_TCGA	tumor	5.7396
TCGA.AB.2927.03	LAML	LAML_tumor_TCGA	tumor	6.0713
TCGA.AB.2972.03	LAML	LAML_tumor_TCGA	tumor	5.4989
TCGA.AB.2985.03	LAML	LAML_tumor_TCGA	tumor	5.504
TCGA.AB.2810.03	LAML	LAML_tumor_TCGA	tumor	6.5726
TCGA.AB.2899.03	LAML	LAML_tumor_TCGA	tumor	6.1807
TCGA.AB.2903.03	LAML	LAML_tumor_TCGA	tumor	5.49
TCGA.AB.2971.03	LAML	LAML_tumor_TCGA	tumor	5.6539
TCGA.AB.2858.03	LAML	LAML_tumor_TCGA	tumor	5.6323
TCGA.AB.2987.03	LAML	LAML_tumor_TCGA	tumor	5.4019
TCGA.AB.2882.03	LAML	LAML_tumor_TCGA	tumor	6.0538
TCGA.AB.2915.03	LAML	LAML_tumor_TCGA	tumor	5.9939
TCGA.AB.2929.03	LAML	LAML_tumor_TCGA	tumor	7.17
TCGA.AB.2977.03	LAML	LAML_tumor_TCGA	tumor	6.2141
TCGA.AB.2943.03	LAML	LAML_tumor_TCGA	tumor	5.1119
TCGA.AB.2898.03	LAML	LAML_tumor_TCGA	tumor	5.9293
TCGA.AB.2879.03	LAML	LAML_tumor_TCGA	tumor	6.1443
TCGA.AB.2973.03	LAML	LAML_tumor_TCGA	tumor	4.6793
TCGA.AB.2998.03	LAML	LAML_tumor_TCGA	tumor	6.229
TCGA.AB.2942.03	LAML	LAML_tumor_TCGA	tumor	5.4506
TCGA.AB.2988.03	LAML	LAML_tumor_TCGA	tumor	5.9383
TCGA.AB.2837.03	LAML	LAML_tumor_TCGA	tumor	5.967
TCGA.AB.2851.03	LAML	LAML_tumor_TCGA	tumor	6.1475
TCGA.AB.2867.03	LAML	LAML_tumor_TCGA	tumor	5.3972
TCGA.AB.2826.03	LAML	LAML_tumor_TCGA	tumor	5.0009
TCGA.AB.2830.03	LAML	LAML_tumor_TCGA	tumor	5.8306
TCGA.AB.2869.03	LAML	LAML_tumor_TCGA	tumor	5.8968
TCGA.AB.2930.03	LAML	LAML_tumor_TCGA	tumor	6.1115
TCGA.AB.2818.03	LAML	LAML_tumor_TCGA	tumor	5.347
TCGA.AB.2803.03	LAML	LAML_tumor_TCGA	tumor	4.7997
TCGA.AB.2823.03	LAML	LAML_tumor_TCGA	tumor	6.086
TCGA.AB.2910.03	LAML	LAML_tumor_TCGA	tumor	7.3554
TCGA.AB.2936.03	LAML	LAML_tumor_TCGA	tumor	5.6921
TCGA.AB.2978.03	LAML	LAML_tumor_TCGA	tumor	4.3499
TCGA.AB.2832.03	LAML	LAML_tumor_TCGA	tumor	6.2219
TCGA.AB.2860.03	LAML	LAML_tumor_TCGA	tumor	6.0518
TCGA.AB.2877.03	LAML	LAML_tumor_TCGA	tumor	6.2298
TCGA.AB.2887.03	LAML	LAML_tumor_TCGA	tumor	5.7315
TCGA.AB.2952.03	LAML	LAML_tumor_TCGA	tumor	6.505
TCGA.AB.2964.03	LAML	LAML_tumor_TCGA	tumor	4.7882
TCGA.AB.2816.03	LAML	LAML_tumor_TCGA	tumor	5.5355
TCGA.AB.2846.03	LAML	LAML_tumor_TCGA	tumor	5.9272
TCGA.AB.2966.03	LAML	LAML_tumor_TCGA	tumor	4.9218
TCGA.AB.2993.03	LAML	LAML_tumor_TCGA	tumor	5.6142
TCGA.AB.2921.03	LAML	LAML_tumor_TCGA	tumor	5.769
TCGA.AB.2955.03	LAML	LAML_tumor_TCGA	tumor	4.7077
TCGA.AB.2954.03	LAML	LAML_tumor_TCGA	tumor	5.6364
TCGA.AB.2919.03	LAML	LAML_tumor_TCGA	tumor	6.5899
TCGA.AB.2819.03	LAML	LAML_tumor_TCGA	tumor	5.4598
TCGA.AB.2839.03	LAML	LAML_tumor_TCGA	tumor	5.467
TCGA.AB.2841.03	LAML	LAML_tumor_TCGA	tumor	6.0936
TCGA.AB.2854.03	LAML	LAML_tumor_TCGA	tumor	5.572
TCGA.AB.2873.03	LAML	LAML_tumor_TCGA	tumor	6.2256
TCGA.AB.2911.03	LAML	LAML_tumor_TCGA	tumor	5.5826
TCGA.AB.2894.03	LAML	LAML_tumor_TCGA	tumor	5.5395
TCGA.AB.2897.03	LAML	LAML_tumor_TCGA	tumor	6.1177
TCGA.AB.2881.03	LAML	LAML_tumor_TCGA	tumor	5.6551
TCGA.AB.2916.03	LAML	LAML_tumor_TCGA	tumor	4.812
TCGA.AB.2878.03	LAML	LAML_tumor_TCGA	tumor	5.0436
TCGA.AB.2918.03	LAML	LAML_tumor_TCGA	tumor	5.9848
TCGA.AB.2876.03	LAML	LAML_tumor_TCGA	tumor	4.8007
TCGA.AB.2884.03	LAML	LAML_tumor_TCGA	tumor	6.1332
TCGA.AB.2928.03	LAML	LAML_tumor_TCGA	tumor	5.8235
TCGA.AB.2892.03	LAML	LAML_tumor_TCGA	tumor	4.9175
TCGA.AB.2895.03	LAML	LAML_tumor_TCGA	tumor	5.8761
TCGA.AB.2917.03	LAML	LAML_tumor_TCGA	tumor	5.2169
TCGA.AB.2991.03	LAML	LAML_tumor_TCGA	tumor	6.4285
TCGA.AB.2814.03	LAML	LAML_tumor_TCGA	tumor	4.8167
TCGA.AB.2845.03	LAML	LAML_tumor_TCGA	tumor	5.7517
TCGA.AB.2937.03	LAML	LAML_tumor_TCGA	tumor	5.2107
TCGA.AB.2981.03	LAML	LAML_tumor_TCGA	tumor	5.6505
TCGA.AB.2950.03	LAML	LAML_tumor_TCGA	tumor	5.9234
TCGA.AB.2970.03	LAML	LAML_tumor_TCGA	tumor	5.2338
TCGA.AB.2862.03	LAML	LAML_tumor_TCGA	tumor	5.9826
TCGA.AB.2825.03	LAML	LAML_tumor_TCGA	tumor	6.1133
TCGA.AB.2986.03	LAML	LAML_tumor_TCGA	tumor	4.9084
TCGA.AB.2979.03	LAML	LAML_tumor_TCGA	tumor	6.2681
TCGA.AB.2812.03	LAML	LAML_tumor_TCGA	tumor	5.4948
TCGA.AB.2914.03	LAML	LAML_tumor_TCGA	tumor	4.7597
TCGA.AB.2896.03	LAML	LAML_tumor_TCGA	tumor	5.748
TCGA.AB.3011.03	LAML	LAML_tumor_TCGA	tumor	6.6514
TCGA.K1.A3PN.02	SARC	SARC_tumor_TCGA	tumor	7.225
TCGA.K1.A42X.02	SARC	SARC_tumor_TCGA	tumor	6.5958
TCGA.VT.A80J.02	SARC	SARC_tumor_TCGA	tumor	7.0054
TCGA.G5.6572.02	READ	READ_tumor_TCGA	tumor	3.9929
TCGA.29.2414.02	OV	OV_tumor_TCGA	tumor	6.1094
TCGA.13.1489.02	OV	OV_tumor_TCGA	tumor	6.5658
TCGA.23.1023.01	OV	OV_tumor_TCGA	tumor	7.86245
TCGA.29.1770.02	OV	OV_tumor_TCGA	tumor	7.7867
TCGA.13.0913.02	OV	OV_tumor_TCGA	tumor	5.0917
TCGA.29.1705.02	OV	OV_tumor_TCGA	tumor	5.6279
TCGA.29.1707.02	OV	OV_tumor_TCGA	tumor	6.6298
TCGA.61.2008.02	OV	OV_tumor_TCGA	tumor	7.863
TCGA.50.5066.02	LUAD	LUAD_tumor_TCGA	tumor	6.8031
TCGA.50.5946.02	LUAD	LUAD_tumor_TCGA	tumor	5.6747
TCGA.DD.AACA.02	LIHC	LIHC_tumor_TCGA	tumor	4.24723
TCGA.ZS.A9CF.02	LIHC	LIHC_tumor_TCGA	tumor	4.9955
TCGA.BK.A139.02	UCEC	UCEC_tumor_TCGA	tumor	9.6446
TCGA.G4.6317.02	COAD	COAD_tumor_TCGA	tumor	6.2394
TCGA.06.0152.02	GBM	GBM_tumor_TCGA	tumor	6.7177
TCGA.06.0171.02	GBM	GBM_tumor_TCGA	tumor	5.9345
TCGA.06.0190.02	GBM	GBM_tumor_TCGA	tumor	6.8725
TCGA.19.1389.02	GBM	GBM_tumor_TCGA	tumor	5.7485
TCGA.14.0736.02	GBM	GBM_tumor_TCGA	tumor	5.8642
TCGA.06.0211.02	GBM	GBM_tumor_TCGA	tumor	6.0717
TCGA.19.4065.02	GBM	GBM_tumor_TCGA	tumor	7.0305
TCGA.06.0221.02	GBM	GBM_tumor_TCGA	tumor	7.2683
TCGA.06.0210.02	GBM	GBM_tumor_TCGA	tumor	6.4866
TCGA.06.0125.02	GBM	GBM_tumor_TCGA	tumor	7.0225
TCGA.14.1034.02	GBM	GBM_tumor_TCGA	tumor	7.2635
TCGA.14.1402.02	GBM	GBM_tumor_TCGA	tumor	5.0436
TCGA.19.0957.02	GBM	GBM_tumor_TCGA	tumor	6.3625
TCGA.DH.A669.02	LGG	LGG_tumor_TCGA	tumor	6.4957
TCGA.DU.6397.02	LGG	LGG_tumor_TCGA	tumor	6.2935
TCGA.DU.7304.02	LGG	LGG_tumor_TCGA	tumor	7.1064
TCGA.TQ.A7RK.02	LGG	LGG_tumor_TCGA	tumor	6.07634
TCGA.TQ.A7RV.02	LGG	LGG_tumor_TCGA	tumor	6.0072
TCGA.FG.5963.02	LGG	LGG_tumor_TCGA	tumor	6.5492
TCGA.DU.5872.02	LGG	LGG_tumor_TCGA	tumor	5.2991
TCGA.TQ.A8XE.02	LGG	LGG_tumor_TCGA	tumor	6.0418
TCGA.TM.A7CF.02	LGG	LGG_tumor_TCGA	tumor	6.1256
TCGA.FG.5965.02	LGG	LGG_tumor_TCGA	tumor	6.66093
TCGA.DU.6407.02	LGG	LGG_tumor_TCGA	tumor	6.51161
TCGA.DU.5870.02	LGG	LGG_tumor_TCGA	tumor	6.2277
TCGA.FG.A4MT.02	LGG	LGG_tumor_TCGA	tumor	6.5429
TCGA.DU.6404.02	LGG	LGG_tumor_TCGA	tumor	6.57697
TCGA.ND.A4WA.01	UCS	UCS_tumor_TCGA	tumor	6.1989
TCGA.NF.A5CP.01	UCS	UCS_tumor_TCGA	tumor	6.6714
TCGA.N8.A4PP.01	UCS	UCS_tumor_TCGA	tumor	6.5592
TCGA.N7.A4Y5.01	UCS	UCS_tumor_TCGA	tumor	6.0457
TCGA.N6.A4VE.01	UCS	UCS_tumor_TCGA	tumor	7.3584
TCGA.N6.A4VC.01	UCS	UCS_tumor_TCGA	tumor	6.9983
TCGA.ND.A4WC.01	UCS	UCS_tumor_TCGA	tumor	6.1815
TCGA.N8.A4PL.01	UCS	UCS_tumor_TCGA	tumor	6.1363
TCGA.N6.A4VD.01	UCS	UCS_tumor_TCGA	tumor	6.58
TCGA.NA.A4R0.01	UCS	UCS_tumor_TCGA	tumor	6.3804
TCGA.NA.A5I1.01	UCS	UCS_tumor_TCGA	tumor	6.6967
TCGA.N6.A4VG.01	UCS	UCS_tumor_TCGA	tumor	6.1069
TCGA.N9.A4PZ.01	UCS	UCS_tumor_TCGA	tumor	8.1038
TCGA.ND.A4WF.01	UCS	UCS_tumor_TCGA	tumor	6.1481
TCGA.N8.A4PQ.01	UCS	UCS_tumor_TCGA	tumor	6.2863
TCGA.N8.A56S.01	UCS	UCS_tumor_TCGA	tumor	6.9006
TCGA.NA.A4R1.01	UCS	UCS_tumor_TCGA	tumor	8.2585
TCGA.NG.A4VW.01	UCS	UCS_tumor_TCGA	tumor	6.325
TCGA.N8.A4PM.01	UCS	UCS_tumor_TCGA	tumor	6.7218
TCGA.N7.A4Y8.01	UCS	UCS_tumor_TCGA	tumor	7.317
TCGA.NA.A4QV.01	UCS	UCS_tumor_TCGA	tumor	7.0505
TCGA.N5.A4RN.01	UCS	UCS_tumor_TCGA	tumor	7.5034
TCGA.N8.A4PI.01	UCS	UCS_tumor_TCGA	tumor	5.7377
TCGA.N9.A4Q1.01	UCS	UCS_tumor_TCGA	tumor	6.4626
TCGA.N5.A4RD.01	UCS	UCS_tumor_TCGA	tumor	7.1601
TCGA.N5.A4RT.01	UCS	UCS_tumor_TCGA	tumor	7.4783
TCGA.N7.A59B.01	UCS	UCS_tumor_TCGA	tumor	6.7307
TCGA.N9.A4Q7.01	UCS	UCS_tumor_TCGA	tumor	5.4512
TCGA.N5.A4RF.01	UCS	UCS_tumor_TCGA	tumor	7.8689
TCGA.N8.A4PN.01	UCS	UCS_tumor_TCGA	tumor	7.0905
TCGA.N9.A4Q8.01	UCS	UCS_tumor_TCGA	tumor	7.7891
TCGA.N5.A4RO.01	UCS	UCS_tumor_TCGA	tumor	7.7952
TCGA.ND.A4W6.01	UCS	UCS_tumor_TCGA	tumor	8.5036
TCGA.QM.A5NM.01	UCS	UCS_tumor_TCGA	tumor	6.8677
TCGA.N8.A4PO.01	UCS	UCS_tumor_TCGA	tumor	5.5668
TCGA.N5.A4R8.01	UCS	UCS_tumor_TCGA	tumor	6.407
TCGA.N5.A4RS.01	UCS	UCS_tumor_TCGA	tumor	7.7053
TCGA.N5.A59F.01	UCS	UCS_tumor_TCGA	tumor	8.0331
TCGA.N7.A4Y0.01	UCS	UCS_tumor_TCGA	tumor	7.1196
TCGA.N9.A4Q3.01	UCS	UCS_tumor_TCGA	tumor	7.9751
TCGA.N5.A4RA.01	UCS	UCS_tumor_TCGA	tumor	7.0239
TCGA.NG.A4VU.01	UCS	UCS_tumor_TCGA	tumor	7.3455
TCGA.N5.A4RM.01	UCS	UCS_tumor_TCGA	tumor	7.0914
TCGA.N5.A4RV.01	UCS	UCS_tumor_TCGA	tumor	7.1689
TCGA.N5.A59E.01	UCS	UCS_tumor_TCGA	tumor	7.4828
TCGA.NA.A4QY.01	UCS	UCS_tumor_TCGA	tumor	6.7908
TCGA.N5.A4RJ.01	UCS	UCS_tumor_TCGA	tumor	6.6508
TCGA.N9.A4Q4.01	UCS	UCS_tumor_TCGA	tumor	6.2893
TCGA.NA.A4QW.01	UCS	UCS_tumor_TCGA	tumor	7.5899
TCGA.NF.A4WX.01	UCS	UCS_tumor_TCGA	tumor	6.3031
TCGA.NA.A4QX.01	UCS	UCS_tumor_TCGA	tumor	6.4007
TCGA.N6.A4V9.01	UCS	UCS_tumor_TCGA	tumor	6.9544
TCGA.NF.A4WU.01	UCS	UCS_tumor_TCGA	tumor	6.4048
TCGA.NF.A4X2.01	UCS	UCS_tumor_TCGA	tumor	7.9454
TCGA.QN.A5NN.01	UCS	UCS_tumor_TCGA	tumor	6.457
TCGA.N5.A4RU.01	UCS	UCS_tumor_TCGA	tumor	5.6868
TCGA.N6.A4VF.01	UCS	UCS_tumor_TCGA	tumor	6.673
TCGA.EL.A3CO.01	THCA	THCA_tumor_TCGA	tumor	5.8917
TCGA.DJ.A13L.01	THCA	THCA_tumor_TCGA	tumor	5.5189
TCGA.J8.A3YF.01	THCA	THCA_tumor_TCGA	tumor	5.9568
TCGA.FE.A239.01	THCA	THCA_tumor_TCGA	tumor	5.8478
TCGA.EL.A3MY.01	THCA	THCA_tumor_TCGA	tumor	6.2426
TCGA.BJ.A0ZG.01	THCA	THCA_tumor_TCGA	tumor	5.6879
TCGA.BJ.A28S.01	THCA	THCA_tumor_TCGA	tumor	6.1839
TCGA.BJ.A45C.01	THCA	THCA_tumor_TCGA	tumor	5.9098
TCGA.BJ.A2NA.01	THCA	THCA_tumor_TCGA	tumor	6.1965
TCGA.EM.A1CT.01	THCA	THCA_tumor_TCGA	tumor	6.0758
TCGA.FY.A4B0.01	THCA	THCA_tumor_TCGA	tumor	5.5775
TCGA.EL.A4K6.01	THCA	THCA_tumor_TCGA	tumor	6.8041
TCGA.EM.A22O.01	THCA	THCA_tumor_TCGA	tumor	6.8162
TCGA.EL.A4K7.01	THCA	THCA_tumor_TCGA	tumor	6.378
TCGA.MK.A84Z.01	THCA	THCA_tumor_TCGA	tumor	6.0159
TCGA.EM.A4FO.01	THCA	THCA_tumor_TCGA	tumor	5.3896
TCGA.DE.A4MD.01	THCA	THCA_tumor_TCGA	tumor	6.4751
TCGA.BJ.A290.01	THCA	THCA_tumor_TCGA	tumor	6.1739
TCGA.DJ.A1QL.01	THCA	THCA_tumor_TCGA	tumor	6.2451
TCGA.EL.A3GP.01	THCA	THCA_tumor_TCGA	tumor	5.9901
TCGA.FE.A231.01	THCA	THCA_tumor_TCGA	tumor	6.8541
TCGA.DJ.A1QO.01	THCA	THCA_tumor_TCGA	tumor	6.697
TCGA.EM.A4FH.01	THCA	THCA_tumor_TCGA	tumor	5.5598
TCGA.FY.A3NP.01	THCA	THCA_tumor_TCGA	tumor	5.9598
TCGA.EL.A4K9.01	THCA	THCA_tumor_TCGA	tumor	6.1695
TCGA.BJ.A0ZB.01	THCA	THCA_tumor_TCGA	tumor	6.195
TCGA.EL.A3MZ.01	THCA	THCA_tumor_TCGA	tumor	6.0007
TCGA.EM.A2OZ.01	THCA	THCA_tumor_TCGA	tumor	6.7282
TCGA.BJ.A0YZ.01	THCA	THCA_tumor_TCGA	tumor	6.2533
TCGA.DJ.A2PW.01	THCA	THCA_tumor_TCGA	tumor	5.9393
TCGA.EM.A22P.01	THCA	THCA_tumor_TCGA	tumor	5.9395
TCGA.ET.A3DW.01	THCA	THCA_tumor_TCGA	tumor	6.3886
TCGA.DJ.A2PZ.01	THCA	THCA_tumor_TCGA	tumor	5.8535
TCGA.DJ.A3UO.01	THCA	THCA_tumor_TCGA	tumor	6.3365
TCGA.DJ.A3VK.01	THCA	THCA_tumor_TCGA	tumor	6.0424
TCGA.EL.A3T3.01	THCA	THCA_tumor_TCGA	tumor	5.8834
TCGA.EL.A4KI.01	THCA	THCA_tumor_TCGA	tumor	5.9172
TCGA.DJ.A1QG.01	THCA	THCA_tumor_TCGA	tumor	5.7835
TCGA.EL.A3D4.01	THCA	THCA_tumor_TCGA	tumor	5.8485
TCGA.EM.A2CN.01	THCA	THCA_tumor_TCGA	tumor	6.6028
TCGA.ET.A40S.01	THCA	THCA_tumor_TCGA	tumor	5.9871
TCGA.EL.A3D0.01	THCA	THCA_tumor_TCGA	tumor	5.7584
TCGA.EM.A3AO.01	THCA	THCA_tumor_TCGA	tumor	6.1441
TCGA.DJ.A13U.01	THCA	THCA_tumor_TCGA	tumor	6.5494
TCGA.DJ.A4UQ.01	THCA	THCA_tumor_TCGA	tumor	6.1709
TCGA.EL.A3ZM.01	THCA	THCA_tumor_TCGA	tumor	5.5723
TCGA.BJ.A0Z5.01	THCA	THCA_tumor_TCGA	tumor	6.2422
TCGA.BJ.A18Z.01	THCA	THCA_tumor_TCGA	tumor	6.0702
TCGA.EL.A3H2.01	THCA	THCA_tumor_TCGA	tumor	6.2128
TCGA.BJ.A0Z2.01	THCA	THCA_tumor_TCGA	tumor	6.4454
TCGA.E3.A3E5.01	THCA	THCA_tumor_TCGA	tumor	6.1307
TCGA.EM.A3FM.01	THCA	THCA_tumor_TCGA	tumor	6.1607
TCGA.DJ.A13O.01	THCA	THCA_tumor_TCGA	tumor	5.6088
TCGA.DJ.A3V0.01	THCA	THCA_tumor_TCGA	tumor	6.0581
TCGA.BJ.A0Z0.01	THCA	THCA_tumor_TCGA	tumor	5.9644
TCGA.BJ.A0ZC.01	THCA	THCA_tumor_TCGA	tumor	5.86
TCGA.BJ.A190.01	THCA	THCA_tumor_TCGA	tumor	6.2348
TCGA.DJ.A4V5.01	THCA	THCA_tumor_TCGA	tumor	6.2707
TCGA.DJ.A2PO.01	THCA	THCA_tumor_TCGA	tumor	6.0157
TCGA.DJ.A3V6.01	THCA	THCA_tumor_TCGA	tumor	6.3431
TCGA.FY.A76V.01	THCA	THCA_tumor_TCGA	tumor	6.246
TCGA.DJ.A2Q4.01	THCA	THCA_tumor_TCGA	tumor	6.1018
TCGA.BJ.A3PU.01	THCA	THCA_tumor_TCGA	tumor	6.0054
TCGA.DJ.A3VB.01	THCA	THCA_tumor_TCGA	tumor	6.0849
TCGA.EM.A22M.01	THCA	THCA_tumor_TCGA	tumor	4.8783
TCGA.BJ.A3EZ.01	THCA	THCA_tumor_TCGA	tumor	6.2876
TCGA.DJ.A2Q5.01	THCA	THCA_tumor_TCGA	tumor	5.4407
TCGA.FK.A4UB.01	THCA	THCA_tumor_TCGA	tumor	6.2924
TCGA.FY.A4B3.01	THCA	THCA_tumor_TCGA	tumor	6.4978
TCGA.DJ.A13R.01	THCA	THCA_tumor_TCGA	tumor	5.5005
TCGA.DJ.A3VE.01	THCA	THCA_tumor_TCGA	tumor	5.732
TCGA.DO.A2HM.01	THCA	THCA_tumor_TCGA	tumor	6.1483
TCGA.BJ.A4O8.01	THCA	THCA_tumor_TCGA	tumor	6.1469
TCGA.DJ.A2PP.01	THCA	THCA_tumor_TCGA	tumor	6.4901
TCGA.L6.A4EQ.01	THCA	THCA_tumor_TCGA	tumor	6.0771
TCGA.EM.A2OX.01	THCA	THCA_tumor_TCGA	tumor	6.007
TCGA.EM.A2P2.01	THCA	THCA_tumor_TCGA	tumor	6.5057
TCGA.BJ.A45H.01	THCA	THCA_tumor_TCGA	tumor	5.998
TCGA.J8.A42S.01	THCA	THCA_tumor_TCGA	tumor	5.9535
TCGA.DJ.A1QQ.01	THCA	THCA_tumor_TCGA	tumor	6.3334
TCGA.DJ.A1QM.01	THCA	THCA_tumor_TCGA	tumor	6.3064
TCGA.EL.A3TA.01	THCA	THCA_tumor_TCGA	tumor	5.8565
TCGA.ET.A3BS.01	THCA	THCA_tumor_TCGA	tumor	5.1728
TCGA.EL.A4KD.01	THCA	THCA_tumor_TCGA	tumor	5.9122
TCGA.EM.A3AR.01	THCA	THCA_tumor_TCGA	tumor	5.8493
TCGA.KS.A4I3.01	THCA	THCA_tumor_TCGA	tumor	6.5038
TCGA.DJ.A3VG.01	THCA	THCA_tumor_TCGA	tumor	6.0359
TCGA.EL.A3CV.01	THCA	THCA_tumor_TCGA	tumor	6.1088
TCGA.EM.A3FO.01	THCA	THCA_tumor_TCGA	tumor	6.205
TCGA.EM.A3O9.01	THCA	THCA_tumor_TCGA	tumor	5.4912
TCGA.EL.A3D1.01	THCA	THCA_tumor_TCGA	tumor	6.1735
TCGA.EM.A3AJ.01	THCA	THCA_tumor_TCGA	tumor	5.6439
TCGA.ET.A2MZ.01	THCA	THCA_tumor_TCGA	tumor	6.2782
TCGA.ET.A39O.01	THCA	THCA_tumor_TCGA	tumor	6.1721
TCGA.J8.A3O2.01	THCA	THCA_tumor_TCGA	tumor	5.7782
TCGA.J8.A3YH.01	THCA	THCA_tumor_TCGA	tumor	5.96
TCGA.DJ.A3VL.01	THCA	THCA_tumor_TCGA	tumor	5.7685
TCGA.ET.A40Q.01	THCA	THCA_tumor_TCGA	tumor	5.6631
TCGA.J8.A3O0.01	THCA	THCA_tumor_TCGA	tumor	6.3516
TCGA.E3.A3DY.01	THCA	THCA_tumor_TCGA	tumor	6.1156
TCGA.IM.A4EB.01	THCA	THCA_tumor_TCGA	tumor	5.9222
TCGA.BJ.A0ZJ.01	THCA	THCA_tumor_TCGA	tumor	5.8495
TCGA.BJ.A45D.01	THCA	THCA_tumor_TCGA	tumor	6.3606
TCGA.EL.A3T8.01	THCA	THCA_tumor_TCGA	tumor	6.1791
TCGA.EM.A22Q.01	THCA	THCA_tumor_TCGA	tumor	6.6555
TCGA.EM.A3SY.01	THCA	THCA_tumor_TCGA	tumor	6.1471
TCGA.EL.A3ZT.01	THCA	THCA_tumor_TCGA	tumor	6.4281
TCGA.EM.A4FU.01	THCA	THCA_tumor_TCGA	tumor	5.8944
TCGA.MK.A4N6.01	THCA	THCA_tumor_TCGA	tumor	6.6439
TCGA.ET.A39M.01	THCA	THCA_tumor_TCGA	tumor	5.353
TCGA.BJ.A45K.01	THCA	THCA_tumor_TCGA	tumor	6.4448
TCGA.EM.A2P0.01	THCA	THCA_tumor_TCGA	tumor	6.2441
TCGA.EM.A2P1.01	THCA	THCA_tumor_TCGA	tumor	5.3049
TCGA.ET.A25M.01	THCA	THCA_tumor_TCGA	tumor	6.569
TCGA.FE.A236.01	THCA	THCA_tumor_TCGA	tumor	6.5587
TCGA.CE.A485.01	THCA	THCA_tumor_TCGA	tumor	6.1025
TCGA.CE.A3MD.01	THCA	THCA_tumor_TCGA	tumor	5.8518
TCGA.EM.A1CU.01	THCA	THCA_tumor_TCGA	tumor	6.0919
TCGA.EM.A2CL.01	THCA	THCA_tumor_TCGA	tumor	5.6577
TCGA.BJ.A18Y.01	THCA	THCA_tumor_TCGA	tumor	6.0862
TCGA.FY.A3BL.01	THCA	THCA_tumor_TCGA	tumor	6.478
TCGA.DE.A4M9.01	THCA	THCA_tumor_TCGA	tumor	6.432
TCGA.EL.A3CY.01	THCA	THCA_tumor_TCGA	tumor	5.6159
TCGA.EM.A2CK.01	THCA	THCA_tumor_TCGA	tumor	5.9084
TCGA.EM.A4FR.01	THCA	THCA_tumor_TCGA	tumor	6.3062
TCGA.ET.A3BU.01	THCA	THCA_tumor_TCGA	tumor	6.1144
TCGA.DJ.A2PR.01	THCA	THCA_tumor_TCGA	tumor	5.9112
TCGA.ET.A2MX.01	THCA	THCA_tumor_TCGA	tumor	6.5528
TCGA.DJ.A2PQ.01	THCA	THCA_tumor_TCGA	tumor	6.2653
TCGA.H2.A2K9.01	THCA	THCA_tumor_TCGA	tumor	6.84
TCGA.ET.A3BX.01	THCA	THCA_tumor_TCGA	tumor	6.7274
TCGA.DJ.A3VJ.01	THCA	THCA_tumor_TCGA	tumor	6.07
TCGA.FY.A3ON.01	THCA	THCA_tumor_TCGA	tumor	5.8893
TCGA.EL.A3ZP.01	THCA	THCA_tumor_TCGA	tumor	5.9962
TCGA.FE.A3PA.01	THCA	THCA_tumor_TCGA	tumor	6.0027
TCGA.EL.A3ZG.01	THCA	THCA_tumor_TCGA	tumor	6.4187
TCGA.IM.A3U2.01	THCA	THCA_tumor_TCGA	tumor	6.1117
TCGA.EL.A3CW.01	THCA	THCA_tumor_TCGA	tumor	5.8012
TCGA.EM.A3AQ.01	THCA	THCA_tumor_TCGA	tumor	5.9155
TCGA.EM.A3O3.01	THCA	THCA_tumor_TCGA	tumor	5.3067
TCGA.ET.A39I.01	THCA	THCA_tumor_TCGA	tumor	6.2758
TCGA.BJ.A28V.01	THCA	THCA_tumor_TCGA	tumor	6.2306
TCGA.DE.A4MB.01	THCA	THCA_tumor_TCGA	tumor	6.4898
TCGA.EL.A3ZO.01	THCA	THCA_tumor_TCGA	tumor	6.1338
TCGA.EL.A3CR.01	THCA	THCA_tumor_TCGA	tumor	6.1665
TCGA.EL.A3CT.01	THCA	THCA_tumor_TCGA	tumor	6.1731
TCGA.EL.A3ZQ.01	THCA	THCA_tumor_TCGA	tumor	5.5401
TCGA.EM.A2CO.01	THCA	THCA_tumor_TCGA	tumor	5.7803
TCGA.DJ.A3V5.01	THCA	THCA_tumor_TCGA	tumor	6.152
TCGA.E8.A418.01	THCA	THCA_tumor_TCGA	tumor	6.3151
TCGA.4C.A93U.01	THCA	THCA_tumor_TCGA	tumor	6.1079
TCGA.EM.A1YA.01	THCA	THCA_tumor_TCGA	tumor	6.5113
TCGA.EM.A1YB.01	THCA	THCA_tumor_TCGA	tumor	6.3683
TCGA.ET.A39P.01	THCA	THCA_tumor_TCGA	tumor	6.4113
TCGA.EL.A3GQ.01	THCA	THCA_tumor_TCGA	tumor	5.8503
TCGA.EL.A3GU.01	THCA	THCA_tumor_TCGA	tumor	6.4684
TCGA.ET.A2MY.01	THCA	THCA_tumor_TCGA	tumor	6.5198
TCGA.EM.A1YC.01	THCA	THCA_tumor_TCGA	tumor	6.4791
TCGA.EM.A3FP.01	THCA	THCA_tumor_TCGA	tumor	6.0179
TCGA.DJ.A2PN.01	THCA	THCA_tumor_TCGA	tumor	6.4244
TCGA.DJ.A2PT.01	THCA	THCA_tumor_TCGA	tumor	5.9282
TCGA.DJ.A2QC.01	THCA	THCA_tumor_TCGA	tumor	6.1146
TCGA.DJ.A3UZ.01	THCA	THCA_tumor_TCGA	tumor	5.8102
TCGA.EL.A3CL.01	THCA	THCA_tumor_TCGA	tumor	6.4848
TCGA.EL.A3CU.01	THCA	THCA_tumor_TCGA	tumor	5.926
TCGA.BJ.A3PR.01	THCA	THCA_tumor_TCGA	tumor	5.6398
TCGA.EL.A3T9.01	THCA	THCA_tumor_TCGA	tumor	5.6899
TCGA.DJ.A3VM.01	THCA	THCA_tumor_TCGA	tumor	6.1342
TCGA.DJ.A4UL.01	THCA	THCA_tumor_TCGA	tumor	6.2474
TCGA.EL.A4K1.01	THCA	THCA_tumor_TCGA	tumor	5.4719
TCGA.EM.A22N.01	THCA	THCA_tumor_TCGA	tumor	5.4631
TCGA.ET.A3DV.01	THCA	THCA_tumor_TCGA	tumor	6.1312
TCGA.J8.A4HY.01	THCA	THCA_tumor_TCGA	tumor	6.3816
TCGA.BJ.A0ZA.01	THCA	THCA_tumor_TCGA	tumor	6.0866
TCGA.EM.A3AI.01	THCA	THCA_tumor_TCGA	tumor	5.5653
TCGA.EL.A3H1.01	THCA	THCA_tumor_TCGA	tumor	5.9732
TCGA.EL.A3MX.01	THCA	THCA_tumor_TCGA	tumor	6.1661
TCGA.FY.A3R9.01	THCA	THCA_tumor_TCGA	tumor	5.7361
TCGA.FY.A3W9.01	THCA	THCA_tumor_TCGA	tumor	6.782
TCGA.DE.A0XZ.01	THCA	THCA_tumor_TCGA	tumor	5.935
TCGA.DJ.A2Q9.01	THCA	THCA_tumor_TCGA	tumor	5.8565
TCGA.EL.A3GV.01	THCA	THCA_tumor_TCGA	tumor	6.0146
TCGA.BJ.A3F0.01	THCA	THCA_tumor_TCGA	tumor	6.196
TCGA.EL.A3CM.01	THCA	THCA_tumor_TCGA	tumor	6.1853
TCGA.EM.A2OV.01	THCA	THCA_tumor_TCGA	tumor	6.0894
TCGA.EM.A4FV.01	THCA	THCA_tumor_TCGA	tumor	5.9855
TCGA.FY.A3I5.01	THCA	THCA_tumor_TCGA	tumor	6.4887
TCGA.FY.A3YR.01	THCA	THCA_tumor_TCGA	tumor	5.7209
TCGA.BJ.A0ZE.01	THCA	THCA_tumor_TCGA	tumor	6.1027
TCGA.DJ.A1QI.01	THCA	THCA_tumor_TCGA	tumor	6.3839
TCGA.EM.A3FL.01	THCA	THCA_tumor_TCGA	tumor	6.3191
TCGA.DJ.A1QE.01	THCA	THCA_tumor_TCGA	tumor	6.4893
TCGA.EL.A3CS.01	THCA	THCA_tumor_TCGA	tumor	6.6658
TCGA.EM.A2CM.01	THCA	THCA_tumor_TCGA	tumor	5.4552
TCGA.EM.A3AK.01	THCA	THCA_tumor_TCGA	tumor	6.2342
TCGA.EM.A3ST.01	THCA	THCA_tumor_TCGA	tumor	6.5512
TCGA.FY.A3R8.01	THCA	THCA_tumor_TCGA	tumor	6.0317
TCGA.FY.A4B4.01	THCA	THCA_tumor_TCGA	tumor	6.3775
TCGA.DE.A4M8.01	THCA	THCA_tumor_TCGA	tumor	5.1887
TCGA.DJ.A1QF.01	THCA	THCA_tumor_TCGA	tumor	6.1225
TCGA.DJ.A2Q3.01	THCA	THCA_tumor_TCGA	tumor	5.9381
TCGA.FE.A22Z.01	THCA	THCA_tumor_TCGA	tumor	6.561
TCGA.FK.A3SD.01	THCA	THCA_tumor_TCGA	tumor	5.8689
TCGA.FY.A2QD.01	THCA	THCA_tumor_TCGA	tumor	6.2114
TCGA.FY.A3TY.01	THCA	THCA_tumor_TCGA	tumor	5.8001
TCGA.KS.A4I7.01	THCA	THCA_tumor_TCGA	tumor	5.7312
TCGA.DE.A0Y3.01	THCA	THCA_tumor_TCGA	tumor	6.6909
TCGA.DJ.A3V4.01	THCA	THCA_tumor_TCGA	tumor	6.0164
TCGA.DJ.A3VF.01	THCA	THCA_tumor_TCGA	tumor	5.877
TCGA.ET.A3BT.01	THCA	THCA_tumor_TCGA	tumor	6.3665
TCGA.BJ.A45F.01	THCA	THCA_tumor_TCGA	tumor	5.6857
TCGA.EM.A4FM.01	THCA	THCA_tumor_TCGA	tumor	5.8873
TCGA.J8.A4HW.01	THCA	THCA_tumor_TCGA	tumor	6.7939
TCGA.DE.A69K.01	THCA	THCA_tumor_TCGA	tumor	6.3665
TCGA.DJ.A1QH.01	THCA	THCA_tumor_TCGA	tumor	6.585
TCGA.IM.A3ED.01	THCA	THCA_tumor_TCGA	tumor	5.8726
TCGA.L6.A4EU.01	THCA	THCA_tumor_TCGA	tumor	6.0721
TCGA.BJ.A0Z9.01	THCA	THCA_tumor_TCGA	tumor	6.3728
TCGA.DJ.A2Q0.01	THCA	THCA_tumor_TCGA	tumor	6.0007
TCGA.DJ.A2Q2.01	THCA	THCA_tumor_TCGA	tumor	6.6423
TCGA.DJ.A3V3.01	THCA	THCA_tumor_TCGA	tumor	6.0088
TCGA.E8.A3X7.01	THCA	THCA_tumor_TCGA	tumor	5.9296
TCGA.E8.A432.01	THCA	THCA_tumor_TCGA	tumor	6.1891
TCGA.E8.A437.01	THCA	THCA_tumor_TCGA	tumor	6.429
TCGA.EL.A3H5.01	THCA	THCA_tumor_TCGA	tumor	5.0501
TCGA.FY.A3R6.01	THCA	THCA_tumor_TCGA	tumor	5.5985
TCGA.BJ.A291.01	THCA	THCA_tumor_TCGA	tumor	6.0277
TCGA.DJ.A2QA.01	THCA	THCA_tumor_TCGA	tumor	6.2954
TCGA.E8.A242.01	THCA	THCA_tumor_TCGA	tumor	6.0211
TCGA.E8.A434.01	THCA	THCA_tumor_TCGA	tumor	6.251
TCGA.EM.A22J.01	THCA	THCA_tumor_TCGA	tumor	5.7068
TCGA.ET.A25G.01	THCA	THCA_tumor_TCGA	tumor	6.6486
TCGA.DJ.A2PX.01	THCA	THCA_tumor_TCGA	tumor	5.5982
TCGA.E3.A3DZ.01	THCA	THCA_tumor_TCGA	tumor	6.2005
TCGA.EL.A3MW.01	THCA	THCA_tumor_TCGA	tumor	5.9716
TCGA.EL.A3T2.01	THCA	THCA_tumor_TCGA	tumor	6.0162
TCGA.EL.A4JZ.01	THCA	THCA_tumor_TCGA	tumor	6.0124
TCGA.EM.A1CS.01	THCA	THCA_tumor_TCGA	tumor	6.2065
TCGA.EM.A3FR.01	THCA	THCA_tumor_TCGA	tumor	5.7005
TCGA.EM.A3OA.01	THCA	THCA_tumor_TCGA	tumor	5.789
TCGA.ET.A39T.01	THCA	THCA_tumor_TCGA	tumor	6.5995
TCGA.FY.A40L.01	THCA	THCA_tumor_TCGA	tumor	6.0781
TCGA.FY.A40N.01	THCA	THCA_tumor_TCGA	tumor	6.2485
TCGA.IM.A3U3.01	THCA	THCA_tumor_TCGA	tumor	6.3799
TCGA.KS.A4ID.01	THCA	THCA_tumor_TCGA	tumor	5.8706
TCGA.BJ.A0ZF.01	THCA	THCA_tumor_TCGA	tumor	5.9296
TCGA.BJ.A192.01	THCA	THCA_tumor_TCGA	tumor	6.0849
TCGA.EL.A4K0.01	THCA	THCA_tumor_TCGA	tumor	6.035
TCGA.EM.A3O6.01	THCA	THCA_tumor_TCGA	tumor	5.8565
TCGA.H2.A26U.01	THCA	THCA_tumor_TCGA	tumor	6.1424
TCGA.J8.A3YG.01	THCA	THCA_tumor_TCGA	tumor	6.3707
TCGA.DJ.A2PV.01	THCA	THCA_tumor_TCGA	tumor	6.0743
TCGA.DJ.A2QB.01	THCA	THCA_tumor_TCGA	tumor	6.3065
TCGA.E8.A436.01	THCA	THCA_tumor_TCGA	tumor	6.275
TCGA.EL.A3N3.01	THCA	THCA_tumor_TCGA	tumor	6.037
TCGA.EM.A1YD.01	THCA	THCA_tumor_TCGA	tumor	5.7366
TCGA.ET.A2N4.01	THCA	THCA_tumor_TCGA	tumor	6.3565
TCGA.BJ.A0ZH.01	THCA	THCA_tumor_TCGA	tumor	6.2327
TCGA.DE.A4MA.01	THCA	THCA_tumor_TCGA	tumor	6.4971
TCGA.DJ.A13P.01	THCA	THCA_tumor_TCGA	tumor	6.105
TCGA.DJ.A2PU.01	THCA	THCA_tumor_TCGA	tumor	5.8575
TCGA.DJ.A2Q7.01	THCA	THCA_tumor_TCGA	tumor	6.0231
TCGA.DJ.A3VI.01	THCA	THCA_tumor_TCGA	tumor	6.1256
TCGA.E8.A2EA.01	THCA	THCA_tumor_TCGA	tumor	5.6364
TCGA.EM.A22I.01	THCA	THCA_tumor_TCGA	tumor	6.1743
TCGA.ET.A25L.01	THCA	THCA_tumor_TCGA	tumor	6.3156
TCGA.FY.A3WA.01	THCA	THCA_tumor_TCGA	tumor	6.2194
TCGA.J8.A3NZ.01	THCA	THCA_tumor_TCGA	tumor	6.3093
TCGA.BJ.A3PT.01	THCA	THCA_tumor_TCGA	tumor	5.8756
TCGA.BJ.A45I.01	THCA	THCA_tumor_TCGA	tumor	5.9734
TCGA.BJ.A4O9.01	THCA	THCA_tumor_TCGA	tumor	6.7248
TCGA.CE.A3ME.01	THCA	THCA_tumor_TCGA	tumor	6.6514
TCGA.DJ.A13X.01	THCA	THCA_tumor_TCGA	tumor	6.4547
TCGA.DJ.A3UN.01	THCA	THCA_tumor_TCGA	tumor	6.3043
TCGA.DJ.A3UR.01	THCA	THCA_tumor_TCGA	tumor	5.8588
TCGA.E8.A416.01	THCA	THCA_tumor_TCGA	tumor	5.6634
TCGA.EL.A3D6.01	THCA	THCA_tumor_TCGA	tumor	5.7866
TCGA.EM.A2CS.01	THCA	THCA_tumor_TCGA	tumor	6.2493
TCGA.ET.A25R.01	THCA	THCA_tumor_TCGA	tumor	6.2196
TCGA.ET.A2N0.01	THCA	THCA_tumor_TCGA	tumor	6.5406
TCGA.ET.A4KN.01	THCA	THCA_tumor_TCGA	tumor	6.2283
TCGA.FY.A40M.01	THCA	THCA_tumor_TCGA	tumor	6.0624
TCGA.DJ.A3UW.01	THCA	THCA_tumor_TCGA	tumor	5.4403
TCGA.DJ.A3V9.01	THCA	THCA_tumor_TCGA	tumor	6.067
TCGA.E8.A44K.01	THCA	THCA_tumor_TCGA	tumor	6.24
TCGA.EL.A3CP.01	THCA	THCA_tumor_TCGA	tumor	6.0715
TCGA.FK.A3SH.01	THCA	THCA_tumor_TCGA	tumor	6.3386
TCGA.FY.A3R7.01	THCA	THCA_tumor_TCGA	tumor	5.8829
TCGA.QD.A8IV.01	THCA	THCA_tumor_TCGA	tumor	6.2789
TCGA.BJ.A191.01	THCA	THCA_tumor_TCGA	tumor	5.926
TCGA.DE.A3KN.01	THCA	THCA_tumor_TCGA	tumor	6.1928
TCGA.DJ.A3UU.01	THCA	THCA_tumor_TCGA	tumor	6.0468
TCGA.E3.A3E3.01	THCA	THCA_tumor_TCGA	tumor	6.5805
TCGA.EM.A2CJ.01	THCA	THCA_tumor_TCGA	tumor	6.2689
TCGA.EM.A4FN.01	THCA	THCA_tumor_TCGA	tumor	6.0418
TCGA.KS.A4I5.01	THCA	THCA_tumor_TCGA	tumor	6.1571
TCGA.L6.A4ET.01	THCA	THCA_tumor_TCGA	tumor	6.3818
TCGA.BJ.A45G.01	THCA	THCA_tumor_TCGA	tumor	6.3005
TCGA.DJ.A4V4.01	THCA	THCA_tumor_TCGA	tumor	5.8841
TCGA.ET.A39K.01	THCA	THCA_tumor_TCGA	tumor	6.3618
TCGA.FY.A3NM.01	THCA	THCA_tumor_TCGA	tumor	5.8931
TCGA.FY.A3NN.01	THCA	THCA_tumor_TCGA	tumor	5.6773
TCGA.EL.A3CN.01	THCA	THCA_tumor_TCGA	tumor	5.7173
TCGA.EL.A3T7.01	THCA	THCA_tumor_TCGA	tumor	6.1219
TCGA.EL.A3TB.01	THCA	THCA_tumor_TCGA	tumor	6.2223
TCGA.EM.A1YE.01	THCA	THCA_tumor_TCGA	tumor	6.2797
TCGA.EM.A2CU.01	THCA	THCA_tumor_TCGA	tumor	6.126
TCGA.EM.A2P3.01	THCA	THCA_tumor_TCGA	tumor	6.2281
TCGA.ET.A3BV.01	THCA	THCA_tumor_TCGA	tumor	6.3941
TCGA.J8.A3YD.01	THCA	THCA_tumor_TCGA	tumor	6.2306
TCGA.KS.A41I.01	THCA	THCA_tumor_TCGA	tumor	6.0743
TCGA.BJ.A28Z.01	THCA	THCA_tumor_TCGA	tumor	5.3622
TCGA.BJ.A45E.01	THCA	THCA_tumor_TCGA	tumor	4.7187
TCGA.DJ.A2PY.01	THCA	THCA_tumor_TCGA	tumor	6.1983
TCGA.DJ.A3UX.01	THCA	THCA_tumor_TCGA	tumor	6.11
TCGA.E3.A3E1.01	THCA	THCA_tumor_TCGA	tumor	6.1689
TCGA.EL.A3H4.01	THCA	THCA_tumor_TCGA	tumor	6.4757
TCGA.EL.A3ZR.01	THCA	THCA_tumor_TCGA	tumor	6.0396
TCGA.EM.A22K.01	THCA	THCA_tumor_TCGA	tumor	6.0549
TCGA.EM.A2CR.01	THCA	THCA_tumor_TCGA	tumor	6.4899
TCGA.EM.A2OY.01	THCA	THCA_tumor_TCGA	tumor	5.3723
TCGA.EM.A3O7.01	THCA	THCA_tumor_TCGA	tumor	5.7184
TCGA.ET.A2N5.01	THCA	THCA_tumor_TCGA	tumor	5.8022
TCGA.FY.A40K.01	THCA	THCA_tumor_TCGA	tumor	5.7853
TCGA.KS.A4I9.01	THCA	THCA_tumor_TCGA	tumor	6.1914
TCGA.DJ.A3UM.01	THCA	THCA_tumor_TCGA	tumor	6.295
TCGA.DJ.A3UQ.01	THCA	THCA_tumor_TCGA	tumor	6.2487
TCGA.E8.A414.01	THCA	THCA_tumor_TCGA	tumor	6.139
TCGA.EL.A3T0.01	THCA	THCA_tumor_TCGA	tumor	5.9267
TCGA.EM.A3AL.01	THCA	THCA_tumor_TCGA	tumor	6.2493
TCGA.ET.A4KQ.01	THCA	THCA_tumor_TCGA	tumor	5.9236
TCGA.KS.A4IC.01	THCA	THCA_tumor_TCGA	tumor	6.0115
TCGA.DE.A2OL.01	THCA	THCA_tumor_TCGA	tumor	6.431
TCGA.DJ.A2Q1.01	THCA	THCA_tumor_TCGA	tumor	5.5138
TCGA.DJ.A3V2.01	THCA	THCA_tumor_TCGA	tumor	5.5753
TCGA.DJ.A3V7.01	THCA	THCA_tumor_TCGA	tumor	6.0266
TCGA.EL.A3D5.01	THCA	THCA_tumor_TCGA	tumor	6.4629
TCGA.ET.A3BO.01	THCA	THCA_tumor_TCGA	tumor	6.0832
TCGA.FE.A232.01	THCA	THCA_tumor_TCGA	tumor	6.2232
TCGA.DE.A4MC.01	THCA	THCA_tumor_TCGA	tumor	6.0455
TCGA.DJ.A3UT.01	THCA	THCA_tumor_TCGA	tumor	6.1219
TCGA.EL.A4K2.01	THCA	THCA_tumor_TCGA	tumor	6.1528
TCGA.EM.A3SU.01	THCA	THCA_tumor_TCGA	tumor	5.7637
TCGA.ET.A3DP.01	THCA	THCA_tumor_TCGA	tumor	6.119
TCGA.ET.A3DQ.01	THCA	THCA_tumor_TCGA	tumor	5.5586
TCGA.FK.A3S3.01	THCA	THCA_tumor_TCGA	tumor	6.1004
TCGA.BJ.A2N9.01	THCA	THCA_tumor_TCGA	tumor	5.639
TCGA.DJ.A1QN.01	THCA	THCA_tumor_TCGA	tumor	5.6758
TCGA.EL.A3ZH.01	THCA	THCA_tumor_TCGA	tumor	6.1795
TCGA.EM.A3FN.01	THCA	THCA_tumor_TCGA	tumor	5.7434
TCGA.EM.A3SZ.01	THCA	THCA_tumor_TCGA	tumor	6.0798
TCGA.EM.A4FQ.01	THCA	THCA_tumor_TCGA	tumor	6.0657
TCGA.ET.A3DR.01	THCA	THCA_tumor_TCGA	tumor	6.471
TCGA.IM.A41Y.01	THCA	THCA_tumor_TCGA	tumor	6.1526
TCGA.CE.A481.01	THCA	THCA_tumor_TCGA	tumor	6.0259
TCGA.EL.A3GX.01	THCA	THCA_tumor_TCGA	tumor	6.2457
TCGA.EL.A3ZK.01	THCA	THCA_tumor_TCGA	tumor	6.2681
TCGA.EL.A4JV.01	THCA	THCA_tumor_TCGA	tumor	6.1985
TCGA.H2.A3RH.01	THCA	THCA_tumor_TCGA	tumor	6.1542
TCGA.KS.A4IB.01	THCA	THCA_tumor_TCGA	tumor	5.9409
TCGA.L6.A4EP.01	THCA	THCA_tumor_TCGA	tumor	6.2254
TCGA.MK.A4N9.01	THCA	THCA_tumor_TCGA	tumor	6.3525
TCGA.DJ.A2PS.01	THCA	THCA_tumor_TCGA	tumor	5.9549
TCGA.EL.A3GY.01	THCA	THCA_tumor_TCGA	tumor	6.4336
TCGA.EM.A2CQ.01	THCA	THCA_tumor_TCGA	tumor	6.6156
TCGA.EM.A4FF.01	THCA	THCA_tumor_TCGA	tumor	5.9409
TCGA.ET.A25J.01	THCA	THCA_tumor_TCGA	tumor	6.1942
TCGA.H2.A422.01	THCA	THCA_tumor_TCGA	tumor	6.4938
TCGA.BJ.A45J.01	THCA	THCA_tumor_TCGA	tumor	6.1121
TCGA.DJ.A3VA.01	THCA	THCA_tumor_TCGA	tumor	5.9158
TCGA.E8.A415.01	THCA	THCA_tumor_TCGA	tumor	6.1898
TCGA.EM.A1CW.01	THCA	THCA_tumor_TCGA	tumor	6.3234
TCGA.IM.A420.01	THCA	THCA_tumor_TCGA	tumor	6.0734
TCGA.KS.A41L.01	THCA	THCA_tumor_TCGA	tumor	6.0991
TCGA.BJ.A28R.01	THCA	THCA_tumor_TCGA	tumor	6.5035
TCGA.DJ.A2Q6.01	THCA	THCA_tumor_TCGA	tumor	5.8919
TCGA.DJ.A3UP.01	THCA	THCA_tumor_TCGA	tumor	6.1831
TCGA.DJ.A4V2.01	THCA	THCA_tumor_TCGA	tumor	6.3778
TCGA.E8.A413.01	THCA	THCA_tumor_TCGA	tumor	6.0257
TCGA.E8.A417.01	THCA	THCA_tumor_TCGA	tumor	6.054
TCGA.EL.A3T1.01	THCA	THCA_tumor_TCGA	tumor	6.1851
TCGA.EL.A4JW.01	THCA	THCA_tumor_TCGA	tumor	6.5308
TCGA.CE.A484.01	THCA	THCA_tumor_TCGA	tumor	6.3728
TCGA.DJ.A13T.01	THCA	THCA_tumor_TCGA	tumor	6.3124
TCGA.DJ.A3US.01	THCA	THCA_tumor_TCGA	tumor	6.1849
TCGA.EL.A3CZ.01	THCA	THCA_tumor_TCGA	tumor	6.1617
TCGA.EL.A3GS.01	THCA	THCA_tumor_TCGA	tumor	6.4385
TCGA.EL.A3GW.01	THCA	THCA_tumor_TCGA	tumor	6.3865
TCGA.EM.A2OW.01	THCA	THCA_tumor_TCGA	tumor	6.2298
TCGA.ET.A25I.01	THCA	THCA_tumor_TCGA	tumor	5.6525
TCGA.FE.A3PC.01	THCA	THCA_tumor_TCGA	tumor	6.497
TCGA.IM.A41Z.01	THCA	THCA_tumor_TCGA	tumor	6.5365
TCGA.KS.A41F.01	THCA	THCA_tumor_TCGA	tumor	5.6899
TCGA.KS.A4I1.01	THCA	THCA_tumor_TCGA	tumor	6.2464
TCGA.DE.A7U5.01	THCA	THCA_tumor_TCGA	tumor	6.3167
TCGA.DJ.A4UR.01	THCA	THCA_tumor_TCGA	tumor	6.5671
TCGA.DJ.A4V0.01	THCA	THCA_tumor_TCGA	tumor	5.753
TCGA.EL.A3H7.01	THCA	THCA_tumor_TCGA	tumor	6.1206
TCGA.EL.A4KH.01	THCA	THCA_tumor_TCGA	tumor	5.9134
TCGA.EM.A3AN.01	THCA	THCA_tumor_TCGA	tumor	6.0957
TCGA.ET.A25K.01	THCA	THCA_tumor_TCGA	tumor	6.4694
TCGA.FE.A238.01	THCA	THCA_tumor_TCGA	tumor	6.5312
TCGA.DJ.A3UK.01	THCA	THCA_tumor_TCGA	tumor	6.1133
TCGA.EL.A3H8.01	THCA	THCA_tumor_TCGA	tumor	6.1113
TCGA.EL.A4KG.01	THCA	THCA_tumor_TCGA	tumor	6.1239
TCGA.ET.A25O.01	THCA	THCA_tumor_TCGA	tumor	6.1727
TCGA.ET.A39N.01	THCA	THCA_tumor_TCGA	tumor	6.7244
TCGA.BJ.A28T.01	THCA	THCA_tumor_TCGA	tumor	5.3505
TCGA.CE.A483.01	THCA	THCA_tumor_TCGA	tumor	6.2398
TCGA.DE.A69J.01	THCA	THCA_tumor_TCGA	tumor	6.4753
TCGA.DJ.A4UW.01	THCA	THCA_tumor_TCGA	tumor	5.9681
TCGA.E3.A3E0.01	THCA	THCA_tumor_TCGA	tumor	6.0564
TCGA.E3.A3E2.01	THCA	THCA_tumor_TCGA	tumor	5.8245
TCGA.EL.A3GZ.01	THCA	THCA_tumor_TCGA	tumor	6.0779
TCGA.EL.A3T6.01	THCA	THCA_tumor_TCGA	tumor	5.9115
TCGA.EL.A3ZL.01	THCA	THCA_tumor_TCGA	tumor	6.0847
TCGA.ET.A2N3.01	THCA	THCA_tumor_TCGA	tumor	5.9814
TCGA.ET.A3BP.01	THCA	THCA_tumor_TCGA	tumor	6.1248
TCGA.FY.A3I4.01	THCA	THCA_tumor_TCGA	tumor	6.3911
TCGA.H2.A421.01	THCA	THCA_tumor_TCGA	tumor	5.7315
TCGA.BJ.A0Z3.01	THCA	THCA_tumor_TCGA	tumor	5.8322
TCGA.EL.A4K4.01	THCA	THCA_tumor_TCGA	tumor	6.4856
TCGA.EM.A22L.01	THCA	THCA_tumor_TCGA	tumor	6.1773
TCGA.EM.A3O8.01	THCA	THCA_tumor_TCGA	tumor	5.9286
TCGA.EM.A3OB.01	THCA	THCA_tumor_TCGA	tumor	5.9603
TCGA.EM.A4FK.01	THCA	THCA_tumor_TCGA	tumor	6.8586
TCGA.ET.A3BN.01	THCA	THCA_tumor_TCGA	tumor	6.5308
TCGA.ET.A3DO.01	THCA	THCA_tumor_TCGA	tumor	5.9251
TCGA.ET.A3DS.01	THCA	THCA_tumor_TCGA	tumor	6.3111
TCGA.FE.A3PB.01	THCA	THCA_tumor_TCGA	tumor	5.7504
TCGA.GE.A2C6.01	THCA	THCA_tumor_TCGA	tumor	6.1657
TCGA.J8.A3O1.01	THCA	THCA_tumor_TCGA	tumor	6.5629
TCGA.BJ.A28W.01	THCA	THCA_tumor_TCGA	tumor	5.0072
TCGA.BJ.A28X.01	THCA	THCA_tumor_TCGA	tumor	5.8758
TCGA.DJ.A3UY.01	THCA	THCA_tumor_TCGA	tumor	6.3742
TCGA.DJ.A3VD.01	THCA	THCA_tumor_TCGA	tumor	6.0052
TCGA.DJ.A4UT.01	THCA	THCA_tumor_TCGA	tumor	6.2165
TCGA.EM.A1CV.01	THCA	THCA_tumor_TCGA	tumor	6.4328
TCGA.ET.A40P.01	THCA	THCA_tumor_TCGA	tumor	5.9153
TCGA.IM.A3EB.01	THCA	THCA_tumor_TCGA	tumor	5.9381
TCGA.EL.A3GO.01	THCA	THCA_tumor_TCGA	tumor	5.947
TCGA.EL.A3GR.01	THCA	THCA_tumor_TCGA	tumor	6.2913
TCGA.EL.A4JX.01	THCA	THCA_tumor_TCGA	tumor	5.2925
TCGA.EM.A3AP.01	THCA	THCA_tumor_TCGA	tumor	6.1546
TCGA.FK.A3SE.01	THCA	THCA_tumor_TCGA	tumor	6.3677
TCGA.J8.A3YE.01	THCA	THCA_tumor_TCGA	tumor	6.079
TCGA.BJ.A2N7.01	THCA	THCA_tumor_TCGA	tumor	6.1194
TCGA.BJ.A2N8.01	THCA	THCA_tumor_TCGA	tumor	5.7225
TCGA.CE.A13K.01	THCA	THCA_tumor_TCGA	tumor	6.1502
TCGA.DE.A0Y2.01	THCA	THCA_tumor_TCGA	tumor	6.7426
TCGA.DO.A1K0.01	THCA	THCA_tumor_TCGA	tumor	6.516
TCGA.E8.A419.01	THCA	THCA_tumor_TCGA	tumor	6.0068
TCGA.EM.A3FK.01	THCA	THCA_tumor_TCGA	tumor	6.3987
TCGA.ET.A3BW.01	THCA	THCA_tumor_TCGA	tumor	5.9296
TCGA.FE.A230.01	THCA	THCA_tumor_TCGA	tumor	5.6517
TCGA.BJ.A2P4.01	THCA	THCA_tumor_TCGA	tumor	6.2799
TCGA.H2.A3RI.01	THCA	THCA_tumor_TCGA	tumor	6.1645
TCGA.CE.A27D.01	THCA	THCA_tumor_TCGA	tumor	5.6985
TCGA.DJ.A13M.01	THCA	THCA_tumor_TCGA	tumor	6.0566
TCGA.DJ.A3V8.01	THCA	THCA_tumor_TCGA	tumor	6.1158
TCGA.EL.A3ZN.01	THCA	THCA_tumor_TCGA	tumor	6.1508
TCGA.EM.A3SX.01	THCA	THCA_tumor_TCGA	tumor	6.2265
TCGA.ET.A25N.01	THCA	THCA_tumor_TCGA	tumor	6.2589
TCGA.FK.A3SB.01	THCA	THCA_tumor_TCGA	tumor	6.1117
TCGA.KS.A41J.01	THCA	THCA_tumor_TCGA	tumor	6.1681
TCGA.CE.A482.01	THCA	THCA_tumor_TCGA	tumor	6.1669
TCGA.ET.A39S.01	THCA	THCA_tumor_TCGA	tumor	6.2468
TCGA.ET.A3BQ.01	THCA	THCA_tumor_TCGA	tumor	6.1344
TCGA.FE.A23A.01	THCA	THCA_tumor_TCGA	tumor	5.9864
TCGA.EM.A2CP.01	THCA	THCA_tumor_TCGA	tumor	5.4725
TCGA.EM.A4G1.01	THCA	THCA_tumor_TCGA	tumor	6.3613
TCGA.ET.A40T.01	THCA	THCA_tumor_TCGA	tumor	6.1865
TCGA.FE.A234.01	THCA	THCA_tumor_TCGA	tumor	6.4796
TCGA.FE.A235.01	THCA	THCA_tumor_TCGA	tumor	5.8748
TCGA.E8.A433.01	THCA	THCA_tumor_TCGA	tumor	6.0383
TCGA.EL.A3N2.01	THCA	THCA_tumor_TCGA	tumor	6.1621
TCGA.EM.A3FJ.01	THCA	THCA_tumor_TCGA	tumor	5.9971
TCGA.ET.A25P.01	THCA	THCA_tumor_TCGA	tumor	6.467
TCGA.ET.A39R.01	THCA	THCA_tumor_TCGA	tumor	6.0155
TCGA.ET.A40R.01	THCA	THCA_tumor_TCGA	tumor	6.3223
TCGA.DO.A1JZ.01	THCA	THCA_tumor_TCGA	tumor	6.3308
TCGA.E8.A438.01	THCA	THCA_tumor_TCGA	tumor	6.5947
TCGA.E8.A44M.01	THCA	THCA_tumor_TCGA	tumor	5.6335
TCGA.ET.A39J.01	THCA	THCA_tumor_TCGA	tumor	6.2001
TCGA.ET.A3DT.01	THCA	THCA_tumor_TCGA	tumor	5.1273
TCGA.EL.A3CX.01	THCA	THCA_tumor_TCGA	tumor	5.904
TCGA.EL.A3ZS.01	THCA	THCA_tumor_TCGA	tumor	6.2694
TCGA.DJ.A13V.01	THCA	THCA_tumor_TCGA	tumor	6.2911
TCGA.ET.A3DU.01	THCA	THCA_tumor_TCGA	tumor	5.5094
TCGA.FK.A3SG.01	THCA	THCA_tumor_TCGA	tumor	6.3688
TCGA.FY.A3RA.01	THCA	THCA_tumor_TCGA	tumor	6.4256
TCGA.DJ.A1QD.01	THCA	THCA_tumor_TCGA	tumor	6.2271
TCGA.EM.A2CT.01	THCA	THCA_tumor_TCGA	tumor	6.6895
TCGA.ET.A39L.01	THCA	THCA_tumor_TCGA	tumor	6.1054
TCGA.MK.A4N7.01	THCA	THCA_tumor_TCGA	tumor	6.5219
TCGA.DJ.A13S.01	THCA	THCA_tumor_TCGA	tumor	6.2238
TCGA.EL.A3H3.01	THCA	THCA_tumor_TCGA	tumor	5.3509
TCGA.EM.A3FQ.01	THCA	THCA_tumor_TCGA	tumor	5.7777
TCGA.FE.A237.01	THCA	THCA_tumor_TCGA	tumor	6.7096
TCGA.DJ.A3UV.01	THCA	THCA_tumor_TCGA	tumor	6.2937
TCGA.E8.A2JQ.01	THCA	THCA_tumor_TCGA	tumor	5.6927
TCGA.FE.A233.01	THCA	THCA_tumor_TCGA	tumor	6.7034
TCGA.FE.A3PD.01	THCA	THCA_tumor_TCGA	tumor	5.9371
TCGA.DJ.A4UP.01	THCA	THCA_tumor_TCGA	tumor	5.824
TCGA.XM.A8RI.01	THYM	THYM_tumor_TCGA	tumor	6.2784
TCGA.XU.A92Z.01	THYM	THYM_tumor_TCGA	tumor	6.2327
TCGA.XM.AAZ2.01	THYM	THYM_tumor_TCGA	tumor	5.6194
TCGA.ZB.A96H.01	THYM	THYM_tumor_TCGA	tumor	5.3241
TCGA.ZB.A96P.01	THYM	THYM_tumor_TCGA	tumor	5.5871
TCGA.3Q.A9WF.01	THYM	THYM_tumor_TCGA	tumor	5.1023
TCGA.ZB.A964.01	THYM	THYM_tumor_TCGA	tumor	6.0796
TCGA.YT.A95H.01	THYM	THYM_tumor_TCGA	tumor	5.3256
TCGA.ZB.A961.01	THYM	THYM_tumor_TCGA	tumor	5.8359
TCGA.ZB.A96K.01	THYM	THYM_tumor_TCGA	tumor	5.6238
TCGA.4V.A9QI.01	THYM	THYM_tumor_TCGA	tumor	5.5148
TCGA.X7.A8DJ.01	THYM	THYM_tumor_TCGA	tumor	5.4016
TCGA.5V.A9RR.01	THYM	THYM_tumor_TCGA	tumor	5.9651
TCGA.XH.A853.01	THYM	THYM_tumor_TCGA	tumor	5.442
TCGA.XM.A8RC.01	THYM	THYM_tumor_TCGA	tumor	6.1759
TCGA.XM.A8RG.01	THYM	THYM_tumor_TCGA	tumor	5.2319
TCGA.XU.A92U.01	THYM	THYM_tumor_TCGA	tumor	5.432
TCGA.3G.AB0Q.01	THYM	THYM_tumor_TCGA	tumor	5.3024
TCGA.4V.A9QJ.01	THYM	THYM_tumor_TCGA	tumor	5.639
TCGA.XM.AAZ3.01	THYM	THYM_tumor_TCGA	tumor	5.6932
TCGA.ZB.A962.01	THYM	THYM_tumor_TCGA	tumor	5.864
TCGA.3S.A8YW.01	THYM	THYM_tumor_TCGA	tumor	4.7809
TCGA.XU.A92O.01	THYM	THYM_tumor_TCGA	tumor	5.2292
TCGA.XU.AAXZ.01	THYM	THYM_tumor_TCGA	tumor	5.7461
TCGA.ZC.AAA7.01	THYM	THYM_tumor_TCGA	tumor	5.6801
TCGA.4V.A9QW.01	THYM	THYM_tumor_TCGA	tumor	5.2265
TCGA.5U.AB0E.01	THYM	THYM_tumor_TCGA	tumor	5.7439
TCGA.XU.A92W.01	THYM	THYM_tumor_TCGA	tumor	5.5787
TCGA.ZL.A9V6.01	THYM	THYM_tumor_TCGA	tumor	5.4941
TCGA.ZB.A96E.01	THYM	THYM_tumor_TCGA	tumor	5.4456
TCGA.ZB.A96G.01	THYM	THYM_tumor_TCGA	tumor	5.1615
TCGA.5K.AAAP.01	THYM	THYM_tumor_TCGA	tumor	5.3961
TCGA.X7.A8D8.01	THYM	THYM_tumor_TCGA	tumor	5.6218
TCGA.ZB.A96A.01	THYM	THYM_tumor_TCGA	tumor	5.341
TCGA.4X.A9FA.01	THYM	THYM_tumor_TCGA	tumor	5.1202
TCGA.YT.A95E.01	THYM	THYM_tumor_TCGA	tumor	5.5145
TCGA.ZC.AAAH.01	THYM	THYM_tumor_TCGA	tumor	5.2254
TCGA.X7.A8M1.01	THYM	THYM_tumor_TCGA	tumor	5.5874
TCGA.ZB.A96B.01	THYM	THYM_tumor_TCGA	tumor	5.2157
TCGA.XU.A92Q.01	THYM	THYM_tumor_TCGA	tumor	5.3488
TCGA.ZB.A96Q.01	THYM	THYM_tumor_TCGA	tumor	5.6764
TCGA.3G.AB0O.01	THYM	THYM_tumor_TCGA	tumor	5.7115
TCGA.X7.A8DG.01	THYM	THYM_tumor_TCGA	tumor	5.3879
TCGA.ZB.A963.01	THYM	THYM_tumor_TCGA	tumor	5.9939
TCGA.3G.AB0T.01	THYM	THYM_tumor_TCGA	tumor	5.6904
TCGA.X7.A8M8.01	THYM	THYM_tumor_TCGA	tumor	5.3295
TCGA.4X.A9FB.01	THYM	THYM_tumor_TCGA	tumor	5.1023
TCGA.XM.A8RL.01	THYM	THYM_tumor_TCGA	tumor	5.3449
TCGA.ZB.A96V.01	THYM	THYM_tumor_TCGA	tumor	5.2687
TCGA.X7.A8M6.01	THYM	THYM_tumor_TCGA	tumor	5.0747
TCGA.XU.A930.01	THYM	THYM_tumor_TCGA	tumor	5.8968
TCGA.XU.AAXY.01	THYM	THYM_tumor_TCGA	tumor	5.3016
TCGA.XM.AAZ1.01	THYM	THYM_tumor_TCGA	tumor	5.4725
TCGA.X7.A8M4.01	THYM	THYM_tumor_TCGA	tumor	5.0081
TCGA.X7.A8DF.01	THYM	THYM_tumor_TCGA	tumor	5.2068
TCGA.4V.A9QM.01	THYM	THYM_tumor_TCGA	tumor	5.3399
TCGA.ZB.A96F.01	THYM	THYM_tumor_TCGA	tumor	6.1268
TCGA.ZC.AAAA.01	THYM	THYM_tumor_TCGA	tumor	5.6528
TCGA.ZB.A96R.01	THYM	THYM_tumor_TCGA	tumor	6.2327
TCGA.XU.A932.01	THYM	THYM_tumor_TCGA	tumor	5.3636
TCGA.X7.A8M7.01	THYM	THYM_tumor_TCGA	tumor	5.5515
TCGA.XU.A92X.01	THYM	THYM_tumor_TCGA	tumor	5.6668
TCGA.XM.A8RF.01	THYM	THYM_tumor_TCGA	tumor	5.5047
TCGA.XU.A92T.01	THYM	THYM_tumor_TCGA	tumor	5.7071
TCGA.4V.A9QT.01	THYM	THYM_tumor_TCGA	tumor	5.5466
TCGA.ZB.A966.01	THYM	THYM_tumor_TCGA	tumor	5.3862
TCGA.4V.A9QX.01	THYM	THYM_tumor_TCGA	tumor	5.62
TCGA.ZB.A96C.01	THYM	THYM_tumor_TCGA	tumor	5.6568
TCGA.3G.AB19.01	THYM	THYM_tumor_TCGA	tumor	5.6996
TCGA.4V.A9QU.01	THYM	THYM_tumor_TCGA	tumor	5.4884
TCGA.ZB.A965.01	THYM	THYM_tumor_TCGA	tumor	6.1179
TCGA.ZC.AAAF.01	THYM	THYM_tumor_TCGA	tumor	5.3338
TCGA.ZT.A8OM.01	THYM	THYM_tumor_TCGA	tumor	5.8443
TCGA.XU.A92V.01	THYM	THYM_tumor_TCGA	tumor	5.5407
TCGA.ZB.A969.01	THYM	THYM_tumor_TCGA	tumor	6.0251
TCGA.5U.AB0D.01	THYM	THYM_tumor_TCGA	tumor	6.126
TCGA.X7.A8DB.01	THYM	THYM_tumor_TCGA	tumor	5.4239
TCGA.XM.A8R9.01	THYM	THYM_tumor_TCGA	tumor	5.4067
TCGA.XU.A92Y.01	THYM	THYM_tumor_TCGA	tumor	6.3463
TCGA.ZB.A96I.01	THYM	THYM_tumor_TCGA	tumor	5.6074
TCGA.ZB.A96L.01	THYM	THYM_tumor_TCGA	tumor	5.9251
TCGA.XM.A8RD.01	THYM	THYM_tumor_TCGA	tumor	5.7339
TCGA.XM.A8RB.01	THYM	THYM_tumor_TCGA	tumor	5.7374
TCGA.XM.A8R8.01	THYM	THYM_tumor_TCGA	tumor	4.774
TCGA.X7.A8M5.01	THYM	THYM_tumor_TCGA	tumor	4.8915
TCGA.XU.A936.01	THYM	THYM_tumor_TCGA	tumor	5.7143
TCGA.X7.A8M3.01	THYM	THYM_tumor_TCGA	tumor	6.2203
TCGA.XU.AAY0.01	THYM	THYM_tumor_TCGA	tumor	5.2754
TCGA.X7.A8M0.01	THYM	THYM_tumor_TCGA	tumor	5.7782
TCGA.XU.A931.01	THYM	THYM_tumor_TCGA	tumor	5.1132
TCGA.YT.A95G.01	THYM	THYM_tumor_TCGA	tumor	5.8058
TCGA.XM.A8RH.01	THYM	THYM_tumor_TCGA	tumor	5.5299
TCGA.4V.A9QL.01	THYM	THYM_tumor_TCGA	tumor	5.5626
TCGA.5U.AB0F.01	THYM	THYM_tumor_TCGA	tumor	5.2103
TCGA.4X.A9F9.01	THYM	THYM_tumor_TCGA	tumor	5.1375
TCGA.ZB.A96M.01	THYM	THYM_tumor_TCGA	tumor	5.9011
TCGA.3S.AAYX.01	THYM	THYM_tumor_TCGA	tumor	5.7916
TCGA.YT.A95F.01	THYM	THYM_tumor_TCGA	tumor	5.7669
TCGA.X7.A8DD.01	THYM	THYM_tumor_TCGA	tumor	5.2312
TCGA.XM.A8RE.01	THYM	THYM_tumor_TCGA	tumor	5.7423
TCGA.ZB.A96O.01	THYM	THYM_tumor_TCGA	tumor	5.1388
TCGA.4V.A9QS.01	THYM	THYM_tumor_TCGA	tumor	5.6871
TCGA.5G.A9ZZ.01	THYM	THYM_tumor_TCGA	tumor	5.6944
TCGA.XU.A933.01	THYM	THYM_tumor_TCGA	tumor	5.7687
TCGA.ZB.A96D.01	THYM	THYM_tumor_TCGA	tumor	5.9006
TCGA.4V.A9QR.01	THYM	THYM_tumor_TCGA	tumor	6.3899
TCGA.XU.AAY1.01	THYM	THYM_tumor_TCGA	tumor	5.2457
TCGA.4X.A9FC.01	THYM	THYM_tumor_TCGA	tumor	5.4219
TCGA.YT.A95D.01	THYM	THYM_tumor_TCGA	tumor	5.4604
TCGA.X7.A8D6.01	THYM	THYM_tumor_TCGA	tumor	5.7562
TCGA.X7.A8D7.01	THYM	THYM_tumor_TCGA	tumor	5.9383
TCGA.XU.AAXV.01	THYM	THYM_tumor_TCGA	tumor	5.7434
TCGA.XU.AAXX.01	THYM	THYM_tumor_TCGA	tumor	6.0851
TCGA.4X.A9FD.01	THYM	THYM_tumor_TCGA	tumor	6.1819
TCGA.4V.A9QN.01	THYM	THYM_tumor_TCGA	tumor	5.8936
TCGA.XU.AAXW.01	THYM	THYM_tumor_TCGA	tumor	5.6419
TCGA.X7.A8DE.01	THYM	THYM_tumor_TCGA	tumor	5.6775
TCGA.3T.AA9L.01	THYM	THYM_tumor_TCGA	tumor	5.7247
TCGA.X7.A8D9.01	THYM	THYM_tumor_TCGA	tumor	5.7255
TCGA.XY.A8S2.01	TGCT	TGCT_tumor_TCGA	tumor	6.2283
TCGA.YU.A94I.01	TGCT	TGCT_tumor_TCGA	tumor	6.6802
TCGA.2G.AAG3.01	TGCT	TGCT_tumor_TCGA	tumor	5.8278
TCGA.XE.AANV.01	TGCT	TGCT_tumor_TCGA	tumor	5.7241
TCGA.2G.AAGM.01	TGCT	TGCT_tumor_TCGA	tumor	7.0244
TCGA.XE.AAOF.01	TGCT	TGCT_tumor_TCGA	tumor	5.7706
TCGA.ZM.AA0H.01	TGCT	TGCT_tumor_TCGA	tumor	5.0854
TCGA.2X.A9D5.01	TGCT	TGCT_tumor_TCGA	tumor	5.4575
TCGA.2G.AAHA.01	TGCT	TGCT_tumor_TCGA	tumor	5.257
TCGA.XE.AAO6.01	TGCT	TGCT_tumor_TCGA	tumor	5.381
TCGA.2G.AAH8.01	TGCT	TGCT_tumor_TCGA	tumor	5.2865
TCGA.YU.A90W.01	TGCT	TGCT_tumor_TCGA	tumor	4.9397
TCGA.ZM.AA06.01	TGCT	TGCT_tumor_TCGA	tumor	6.4351
TCGA.2G.AALP.01	TGCT	TGCT_tumor_TCGA	tumor	7.104
TCGA.2X.A9D6.01	TGCT	TGCT_tumor_TCGA	tumor	6.37
TCGA.2G.AAFI.01	TGCT	TGCT_tumor_TCGA	tumor	6.6068
TCGA.2G.AAGN.01	TGCT	TGCT_tumor_TCGA	tumor	6.4811
TCGA.2G.AAGO.01	TGCT	TGCT_tumor_TCGA	tumor	5.3965
TCGA.XE.AAO4.01	TGCT	TGCT_tumor_TCGA	tumor	5.3227
TCGA.2G.AAGS.01	TGCT	TGCT_tumor_TCGA	tumor	6.7053
TCGA.VF.A8AE.01	TGCT	TGCT_tumor_TCGA	tumor	4.8012
TCGA.XE.AANJ.01	TGCT	TGCT_tumor_TCGA	tumor	5.9456
TCGA.XE.AAOD.01	TGCT	TGCT_tumor_TCGA	tumor	4.8284
TCGA.ZM.AA0E.01	TGCT	TGCT_tumor_TCGA	tumor	5.3699
TCGA.2G.AAEX.01	TGCT	TGCT_tumor_TCGA	tumor	4.8905
TCGA.2G.AAFH.01	TGCT	TGCT_tumor_TCGA	tumor	4.2736
TCGA.2G.AAGA.01	TGCT	TGCT_tumor_TCGA	tumor	6.5928
TCGA.2G.AAGW.01	TGCT	TGCT_tumor_TCGA	tumor	6.7439
TCGA.SB.A76C.01	TGCT	TGCT_tumor_TCGA	tumor	6.0883
TCGA.WZ.A8D5.01	TGCT	TGCT_tumor_TCGA	tumor	5.2044
TCGA.XE.AAOL.01	TGCT	TGCT_tumor_TCGA	tumor	4.8724
TCGA.2G.AAFE.01	TGCT	TGCT_tumor_TCGA	tumor	6.3749
TCGA.S6.A8JW.01	TGCT	TGCT_tumor_TCGA	tumor	5.3027
TCGA.XE.AANI.01	TGCT	TGCT_tumor_TCGA	tumor	6.8469
TCGA.XY.A9T9.01	TGCT	TGCT_tumor_TCGA	tumor	5.359
TCGA.2G.AAG5.01	TGCT	TGCT_tumor_TCGA	tumor	5.8174
TCGA.VF.A8AD.01	TGCT	TGCT_tumor_TCGA	tumor	6.523
TCGA.ZM.AA05.01	TGCT	TGCT_tumor_TCGA	tumor	5.3176
TCGA.2G.AAFL.01	TGCT	TGCT_tumor_TCGA	tumor	5.964
TCGA.XE.A9SE.01	TGCT	TGCT_tumor_TCGA	tumor	5.572
TCGA.XY.A89B.01	TGCT	TGCT_tumor_TCGA	tumor	5.4152
TCGA.ZM.AA0F.01	TGCT	TGCT_tumor_TCGA	tumor	5.4598
TCGA.2G.AAH4.01	TGCT	TGCT_tumor_TCGA	tumor	6.6934
TCGA.4K.AA1G.01	TGCT	TGCT_tumor_TCGA	tumor	5.931
TCGA.YU.A912.01	TGCT	TGCT_tumor_TCGA	tumor	6.0936
TCGA.ZM.AA0D.01	TGCT	TGCT_tumor_TCGA	tumor	5.3434
TCGA.2G.AAF8.01	TGCT	TGCT_tumor_TCGA	tumor	4.9486
TCGA.2G.AAFO.01	TGCT	TGCT_tumor_TCGA	tumor	6.3563
TCGA.2G.AAG7.01	TGCT	TGCT_tumor_TCGA	tumor	6.8672
TCGA.2G.AAGI.01	TGCT	TGCT_tumor_TCGA	tumor	6.1426
TCGA.2G.AAGP.01	TGCT	TGCT_tumor_TCGA	tumor	6.982
TCGA.2G.AAHC.01	TGCT	TGCT_tumor_TCGA	tumor	5.7293
TCGA.X3.A8G4.01	TGCT	TGCT_tumor_TCGA	tumor	6.297
TCGA.XE.AAO3.01	TGCT	TGCT_tumor_TCGA	tumor	5.0922
TCGA.2G.AAFZ.01	TGCT	TGCT_tumor_TCGA	tumor	6.5003
TCGA.2G.AAHN.01	TGCT	TGCT_tumor_TCGA	tumor	5.3785
TCGA.2G.AAHT.01	TGCT	TGCT_tumor_TCGA	tumor	5.8756
TCGA.2G.AAL7.01	TGCT	TGCT_tumor_TCGA	tumor	7.0208
TCGA.ZM.AA0B.01	TGCT	TGCT_tumor_TCGA	tumor	4.9175
TCGA.2G.AAEW.01	TGCT	TGCT_tumor_TCGA	tumor	5.3155
TCGA.2G.AAFM.01	TGCT	TGCT_tumor_TCGA	tumor	6.5184
TCGA.2G.AAFV.01	TGCT	TGCT_tumor_TCGA	tumor	7.096
TCGA.2G.AAHP.01	TGCT	TGCT_tumor_TCGA	tumor	5.3449
TCGA.2G.AAL5.01	TGCT	TGCT_tumor_TCGA	tumor	7.0791
TCGA.4K.AAAL.01	TGCT	TGCT_tumor_TCGA	tumor	6.08
TCGA.VF.A8A9.01	TGCT	TGCT_tumor_TCGA	tumor	5.0605
TCGA.VF.A8AB.01	TGCT	TGCT_tumor_TCGA	tumor	5.3158
TCGA.XE.AAOC.01	TGCT	TGCT_tumor_TCGA	tumor	7.0558
TCGA.2G.AAF4.01	TGCT	TGCT_tumor_TCGA	tumor	5.7461
TCGA.2G.AAFG.01	TGCT	TGCT_tumor_TCGA	tumor	5.8425
TCGA.2G.AAGT.01	TGCT	TGCT_tumor_TCGA	tumor	6.4338
TCGA.2G.AAH0.01	TGCT	TGCT_tumor_TCGA	tumor	5.554
TCGA.SN.A84W.01	TGCT	TGCT_tumor_TCGA	tumor	6.4922
TCGA.SO.A8JP.01	TGCT	TGCT_tumor_TCGA	tumor	5.761
TCGA.VF.A8AC.01	TGCT	TGCT_tumor_TCGA	tumor	5.2312
TCGA.XE.A8H5.01	TGCT	TGCT_tumor_TCGA	tumor	5.5305
TCGA.YU.AA61.01	TGCT	TGCT_tumor_TCGA	tumor	6.5365
TCGA.2G.AAF1.01	TGCT	TGCT_tumor_TCGA	tumor	5.94
TCGA.2G.AAF6.01	TGCT	TGCT_tumor_TCGA	tumor	6.0273
TCGA.2G.AAGC.01	TGCT	TGCT_tumor_TCGA	tumor	6.2604
TCGA.2G.AAGF.01	TGCT	TGCT_tumor_TCGA	tumor	6.1196
TCGA.2G.AAGJ.01	TGCT	TGCT_tumor_TCGA	tumor	6.3354
TCGA.2G.AAGY.01	TGCT	TGCT_tumor_TCGA	tumor	7.6275
TCGA.WZ.A7V4.01	TGCT	TGCT_tumor_TCGA	tumor	6.2174
TCGA.YU.A94D.01	TGCT	TGCT_tumor_TCGA	tumor	6.601
TCGA.2G.AAGZ.01	TGCT	TGCT_tumor_TCGA	tumor	5.9227
TCGA.S6.A8JX.01	TGCT	TGCT_tumor_TCGA	tumor	6.0657
TCGA.S6.A8JY.01	TGCT	TGCT_tumor_TCGA	tumor	5.0365
TCGA.WZ.A7V5.01	TGCT	TGCT_tumor_TCGA	tumor	5.0361
TCGA.XE.AAOB.01	TGCT	TGCT_tumor_TCGA	tumor	5.4175
TCGA.YU.AA4L.01	TGCT	TGCT_tumor_TCGA	tumor	6.9717
TCGA.2G.AAFN.01	TGCT	TGCT_tumor_TCGA	tumor	6.5
TCGA.2G.AAHL.01	TGCT	TGCT_tumor_TCGA	tumor	4.9833
TCGA.2G.AAKL.01	TGCT	TGCT_tumor_TCGA	tumor	6.6492
TCGA.4K.AA1H.01	TGCT	TGCT_tumor_TCGA	tumor	5.1371
TCGA.4K.AA1I.01	TGCT	TGCT_tumor_TCGA	tumor	5.6005
TCGA.SN.A6IS.01	TGCT	TGCT_tumor_TCGA	tumor	5.2521
TCGA.W4.A7U2.01	TGCT	TGCT_tumor_TCGA	tumor	6.1795
TCGA.W4.A7U3.01	TGCT	TGCT_tumor_TCGA	tumor	6.5178
TCGA.YU.A90S.01	TGCT	TGCT_tumor_TCGA	tumor	4.7247
TCGA.2G.AAG9.01	TGCT	TGCT_tumor_TCGA	tumor	5.6106
TCGA.2G.AAHG.01	TGCT	TGCT_tumor_TCGA	tumor	6.0683
TCGA.YU.A90P.01	TGCT	TGCT_tumor_TCGA	tumor	6.4801
TCGA.2G.AAFY.01	TGCT	TGCT_tumor_TCGA	tumor	6.4509
TCGA.2G.AAG6.01	TGCT	TGCT_tumor_TCGA	tumor	6.0117
TCGA.XE.A8H1.01	TGCT	TGCT_tumor_TCGA	tumor	6.5823
TCGA.XE.AAOJ.01	TGCT	TGCT_tumor_TCGA	tumor	6.5887
TCGA.XY.A8S3.01	TGCT	TGCT_tumor_TCGA	tumor	7.0329
TCGA.2G.AAFJ.01	TGCT	TGCT_tumor_TCGA	tumor	6.0592
TCGA.2G.AAG0.01	TGCT	TGCT_tumor_TCGA	tumor	6.6695
TCGA.2G.AAGV.01	TGCT	TGCT_tumor_TCGA	tumor	5.2025
TCGA.W4.A7U4.01	TGCT	TGCT_tumor_TCGA	tumor	6.6929
TCGA.XE.A8H4.01	TGCT	TGCT_tumor_TCGA	tumor	5.3523
TCGA.XE.AANR.01	TGCT	TGCT_tumor_TCGA	tumor	4.9407
TCGA.YU.A90Y.01	TGCT	TGCT_tumor_TCGA	tumor	6.1803
TCGA.2G.AAGX.01	TGCT	TGCT_tumor_TCGA	tumor	6.2411
TCGA.2G.AAKG.01	TGCT	TGCT_tumor_TCGA	tumor	6.4861
TCGA.SB.A6J6.01	TGCT	TGCT_tumor_TCGA	tumor	4.6628
TCGA.2G.AAG8.01	TGCT	TGCT_tumor_TCGA	tumor	6.1437
TCGA.2G.AAGE.01	TGCT	TGCT_tumor_TCGA	tumor	6.1607
TCGA.SN.A84X.01	TGCT	TGCT_tumor_TCGA	tumor	5.1803
TCGA.YU.A90Q.01	TGCT	TGCT_tumor_TCGA	tumor	5.7605
TCGA.2G.AAGG.01	TGCT	TGCT_tumor_TCGA	tumor	6.378
TCGA.2G.AAGK.01	TGCT	TGCT_tumor_TCGA	tumor	6.4557
TCGA.2G.AAH2.01	TGCT	TGCT_tumor_TCGA	tumor	6.0077
TCGA.2G.AAH3.01	TGCT	TGCT_tumor_TCGA	tumor	5.5925
TCGA.WZ.A7V3.01	TGCT	TGCT_tumor_TCGA	tumor	6.0934
TCGA.2G.AAKH.01	TGCT	TGCT_tumor_TCGA	tumor	6.8877
TCGA.2G.AAKD.01	TGCT	TGCT_tumor_TCGA	tumor	6.3872
TCGA.SN.A84Y.01	TGCT	TGCT_tumor_TCGA	tumor	6.6172
TCGA.VF.A8A8.01	TGCT	TGCT_tumor_TCGA	tumor	6.9865
TCGA.2G.AAKM.01	TGCT	TGCT_tumor_TCGA	tumor	6.5301
TCGA.2G.AAKO.01	TGCT	TGCT_tumor_TCGA	tumor	5.927
TCGA.2G.AALF.01	TGCT	TGCT_tumor_TCGA	tumor	6.035
TCGA.2G.AALG.01	TGCT	TGCT_tumor_TCGA	tumor	5.9757
TCGA.2G.AALN.01	TGCT	TGCT_tumor_TCGA	tumor	6.55
TCGA.2G.AALO.01	TGCT	TGCT_tumor_TCGA	tumor	6.569
TCGA.2G.AALQ.01	TGCT	TGCT_tumor_TCGA	tumor	6.9111
TCGA.2G.AALR.01	TGCT	TGCT_tumor_TCGA	tumor	7.4517
TCGA.2G.AALS.01	TGCT	TGCT_tumor_TCGA	tumor	5.8765
TCGA.2G.AALT.01	TGCT	TGCT_tumor_TCGA	tumor	5.8256
TCGA.2G.AALW.01	TGCT	TGCT_tumor_TCGA	tumor	6.5896
TCGA.2G.AALX.01	TGCT	TGCT_tumor_TCGA	tumor	6.9465
TCGA.2G.AALY.01	TGCT	TGCT_tumor_TCGA	tumor	6.926
TCGA.2G.AALZ.01	TGCT	TGCT_tumor_TCGA	tumor	6.2153
TCGA.2G.AAM2.01	TGCT	TGCT_tumor_TCGA	tumor	6.8994
TCGA.2G.AAM3.01	TGCT	TGCT_tumor_TCGA	tumor	5.5348
TCGA.2G.AAM4.01	TGCT	TGCT_tumor_TCGA	tumor	6.2116
TCGA.CD.5804.01	STAD	STAD_tumor_TCGA	tumor	6.3154
TCGA.CG.4306.01	STAD	STAD_tumor_TCGA	tumor	6.0306
TCGA.F1.6177.01	STAD	STAD_tumor_TCGA	tumor	7.1534
TCGA.VQ.A923.01	STAD	STAD_tumor_TCGA	tumor	6.3464
TCGA.BR.4366.01	STAD	STAD_tumor_TCGA	tumor	6.1161
TCGA.CG.5716.01	STAD	STAD_tumor_TCGA	tumor	5.7269
TCGA.CG.4442.01	STAD	STAD_tumor_TCGA	tumor	5.9016
TCGA.CG.4304.01	STAD	STAD_tumor_TCGA	tumor	5.6136
TCGA.IN.A6RL.01	STAD	STAD_tumor_TCGA	tumor	6.2056
TCGA.IN.A6RR.01	STAD	STAD_tumor_TCGA	tumor	6.3558
TCGA.CG.4437.01	STAD	STAD_tumor_TCGA	tumor	5.7989
TCGA.CG.4441.01	STAD	STAD_tumor_TCGA	tumor	6.9637
TCGA.CG.5723.01	STAD	STAD_tumor_TCGA	tumor	6.0237
TCGA.CD.5798.01	STAD	STAD_tumor_TCGA	tumor	5.6404
TCGA.RD.A7C1.01	STAD	STAD_tumor_TCGA	tumor	6.4063
TCGA.BR.7703.01	STAD	STAD_tumor_TCGA	tumor	6.1975
TCGA.CG.4449.01	STAD	STAD_tumor_TCGA	tumor	6.0745
TCGA.VQ.A927.01	STAD	STAD_tumor_TCGA	tumor	5.5993
TCGA.BR.4256.01	STAD	STAD_tumor_TCGA	tumor	6.1653
TCGA.D7.5578.01	STAD	STAD_tumor_TCGA	tumor	6.4617
TCGA.IN.8462.01	STAD	STAD_tumor_TCGA	tumor	5.3841
TCGA.BR.8591.01	STAD	STAD_tumor_TCGA	tumor	6.2563
TCGA.F1.6874.01	STAD	STAD_tumor_TCGA	tumor	6.709
TCGA.F1.6875.01	STAD	STAD_tumor_TCGA	tumor	7.6838
TCGA.FP.8099.01	STAD	STAD_tumor_TCGA	tumor	6.4829
TCGA.VQ.A8E3.01	STAD	STAD_tumor_TCGA	tumor	6.1789
TCGA.BR.4367.01	STAD	STAD_tumor_TCGA	tumor	5.6505
TCGA.KB.A93J.01	STAD	STAD_tumor_TCGA	tumor	6.4542
TCGA.MX.A5UG.01	STAD	STAD_tumor_TCGA	tumor	5.8306
TCGA.RD.A8N5.01	STAD	STAD_tumor_TCGA	tumor	5.9732
TCGA.VQ.A8PE.01	STAD	STAD_tumor_TCGA	tumor	6.4163
TCGA.VQ.A91U.01	STAD	STAD_tumor_TCGA	tumor	5.9319
TCGA.BR.A4CS.01	STAD	STAD_tumor_TCGA	tumor	6.2424
TCGA.D7.6822.01	STAD	STAD_tumor_TCGA	tumor	7.1729
TCGA.FP.7735.01	STAD	STAD_tumor_TCGA	tumor	6.7056
TCGA.FP.7916.01	STAD	STAD_tumor_TCGA	tumor	6.2961
TCGA.FP.7998.01	STAD	STAD_tumor_TCGA	tumor	6.3766
TCGA.FP.A9TM.01	STAD	STAD_tumor_TCGA	tumor	5.7241
TCGA.HU.A4H8.01	STAD	STAD_tumor_TCGA	tumor	6.5851
TCGA.BR.8678.01	STAD	STAD_tumor_TCGA	tumor	7.9089
TCGA.CD.A4MG.01	STAD	STAD_tumor_TCGA	tumor	5.4519
TCGA.CG.4444.01	STAD	STAD_tumor_TCGA	tumor	6.0032
TCGA.CG.4475.01	STAD	STAD_tumor_TCGA	tumor	6.3416
TCGA.HU.8249.01	STAD	STAD_tumor_TCGA	tumor	5.9267
TCGA.IN.A6RS.01	STAD	STAD_tumor_TCGA	tumor	6.2174
TCGA.VQ.A8PF.01	STAD	STAD_tumor_TCGA	tumor	5.8314
TCGA.VQ.A8PP.01	STAD	STAD_tumor_TCGA	tumor	7.0363
TCGA.BR.4369.01	STAD	STAD_tumor_TCGA	tumor	5.4732
TCGA.BR.6707.01	STAD	STAD_tumor_TCGA	tumor	5.4426
TCGA.BR.8683.01	STAD	STAD_tumor_TCGA	tumor	6.3223
TCGA.D7.6518.01	STAD	STAD_tumor_TCGA	tumor	5.6068
TCGA.D7.8575.01	STAD	STAD_tumor_TCGA	tumor	6.3491
TCGA.HU.8610.01	STAD	STAD_tumor_TCGA	tumor	6.1825
TCGA.HU.A4GH.01	STAD	STAD_tumor_TCGA	tumor	6.1689
TCGA.VQ.AA6J.01	STAD	STAD_tumor_TCGA	tumor	6.4906
TCGA.B7.A5TJ.01	STAD	STAD_tumor_TCGA	tumor	5.6625
TCGA.BR.7851.01	STAD	STAD_tumor_TCGA	tumor	6.6431
TCGA.BR.7901.01	STAD	STAD_tumor_TCGA	tumor	7.2765
TCGA.CD.8536.01	STAD	STAD_tumor_TCGA	tumor	5.957
TCGA.HU.A4G6.01	STAD	STAD_tumor_TCGA	tumor	6.442
TCGA.HU.A4GC.01	STAD	STAD_tumor_TCGA	tumor	5.5062
TCGA.IP.7968.01	STAD	STAD_tumor_TCGA	tumor	6.7089
TCGA.VQ.A8PO.01	STAD	STAD_tumor_TCGA	tumor	5.796
TCGA.VQ.A91X.01	STAD	STAD_tumor_TCGA	tumor	6.4748
TCGA.VQ.A94O.01	STAD	STAD_tumor_TCGA	tumor	6.7948
TCGA.CG.5726.01	STAD	STAD_tumor_TCGA	tumor	6.9452
TCGA.D7.A4YU.01	STAD	STAD_tumor_TCGA	tumor	6.0702
TCGA.HU.A4GU.01	STAD	STAD_tumor_TCGA	tumor	6.7628
TCGA.HU.A4HD.01	STAD	STAD_tumor_TCGA	tumor	6.3379
TCGA.VQ.A94T.01	STAD	STAD_tumor_TCGA	tumor	6.8381
TCGA.BR.4191.01	STAD	STAD_tumor_TCGA	tumor	5.9718
TCGA.BR.8059.01	STAD	STAD_tumor_TCGA	tumor	5.4466
TCGA.BR.A4PF.01	STAD	STAD_tumor_TCGA	tumor	7.2584
TCGA.CG.5725.01	STAD	STAD_tumor_TCGA	tumor	7.093
TCGA.D7.8574.01	STAD	STAD_tumor_TCGA	tumor	5.9177
TCGA.D7.8578.01	STAD	STAD_tumor_TCGA	tumor	6.752
TCGA.HU.A4H0.01	STAD	STAD_tumor_TCGA	tumor	6.2542
TCGA.RD.A8MW.01	STAD	STAD_tumor_TCGA	tumor	5.7549
TCGA.VQ.A8P3.01	STAD	STAD_tumor_TCGA	tumor	5.6091
TCGA.CG.5720.01	STAD	STAD_tumor_TCGA	tumor	6.191
TCGA.HU.A4GQ.01	STAD	STAD_tumor_TCGA	tumor	5.523
TCGA.HU.A4H5.01	STAD	STAD_tumor_TCGA	tumor	7.0557
TCGA.R5.A805.01	STAD	STAD_tumor_TCGA	tumor	5.4111
TCGA.ZA.A8F6.01	STAD	STAD_tumor_TCGA	tumor	6.3034
TCGA.3M.AB46.01	STAD	STAD_tumor_TCGA	tumor	5.4192
TCGA.BR.6801.01	STAD	STAD_tumor_TCGA	tumor	6.1221
TCGA.BR.A44U.01	STAD	STAD_tumor_TCGA	tumor	4.9444
TCGA.BR.A4J2.01	STAD	STAD_tumor_TCGA	tumor	5.7656
TCGA.CG.4469.01	STAD	STAD_tumor_TCGA	tumor	5.6459
TCGA.EQ.A4SO.01	STAD	STAD_tumor_TCGA	tumor	6.3416
TCGA.F1.A448.01	STAD	STAD_tumor_TCGA	tumor	5.8248
TCGA.HU.8608.01	STAD	STAD_tumor_TCGA	tumor	5.9681
TCGA.IN.A6RO.01	STAD	STAD_tumor_TCGA	tumor	7.1231
TCGA.RD.A8N1.01	STAD	STAD_tumor_TCGA	tumor	5.9248
TCGA.VQ.A8DZ.01	STAD	STAD_tumor_TCGA	tumor	6.4321
TCGA.VQ.A91D.01	STAD	STAD_tumor_TCGA	tumor	6.4353
TCGA.VQ.A922.01	STAD	STAD_tumor_TCGA	tumor	7.0258
TCGA.VQ.A94U.01	STAD	STAD_tumor_TCGA	tumor	6.1871
TCGA.BR.6457.01	STAD	STAD_tumor_TCGA	tumor	5.8724
TCGA.BR.7197.01	STAD	STAD_tumor_TCGA	tumor	7.1435
TCGA.BR.8384.01	STAD	STAD_tumor_TCGA	tumor	5.8097
TCGA.BR.8686.01	STAD	STAD_tumor_TCGA	tumor	6.3438
TCGA.CD.5801.01	STAD	STAD_tumor_TCGA	tumor	5.8349
TCGA.CG.4305.01	STAD	STAD_tumor_TCGA	tumor	6.302
TCGA.CG.4476.01	STAD	STAD_tumor_TCGA	tumor	5.983
TCGA.FP.7829.01	STAD	STAD_tumor_TCGA	tumor	6.7831
TCGA.HU.A4GF.01	STAD	STAD_tumor_TCGA	tumor	7.0974
TCGA.IN.A7NU.01	STAD	STAD_tumor_TCGA	tumor	6.1412
TCGA.VQ.A8PD.01	STAD	STAD_tumor_TCGA	tumor	5.6177
TCGA.VQ.A91K.01	STAD	STAD_tumor_TCGA	tumor	6.4725
TCGA.VQ.A924.01	STAD	STAD_tumor_TCGA	tumor	6.528
TCGA.CD.A486.01	STAD	STAD_tumor_TCGA	tumor	6.5069
TCGA.CG.4443.01	STAD	STAD_tumor_TCGA	tumor	5.85
TCGA.CG.5734.01	STAD	STAD_tumor_TCGA	tumor	5.5772
TCGA.F1.A72C.01	STAD	STAD_tumor_TCGA	tumor	6.0332
TCGA.FP.8631.01	STAD	STAD_tumor_TCGA	tumor	6.9771
TCGA.FP.A4BF.01	STAD	STAD_tumor_TCGA	tumor	5.2612
TCGA.HU.A4HB.01	STAD	STAD_tumor_TCGA	tumor	5.6562
TCGA.IN.8663.01	STAD	STAD_tumor_TCGA	tumor	6.1954
TCGA.KB.A93G.01	STAD	STAD_tumor_TCGA	tumor	6.508
TCGA.VQ.A8E0.01	STAD	STAD_tumor_TCGA	tumor	6.8206
TCGA.VQ.A8P2.01	STAD	STAD_tumor_TCGA	tumor	6.3089
TCGA.VQ.AA64.01	STAD	STAD_tumor_TCGA	tumor	7.0834
TCGA.VQ.AA6G.01	STAD	STAD_tumor_TCGA	tumor	6.1948
TCGA.VQ.AA6I.01	STAD	STAD_tumor_TCGA	tumor	6.7807
TCGA.BR.6565.01	STAD	STAD_tumor_TCGA	tumor	6.5815
TCGA.VQ.A8P5.01	STAD	STAD_tumor_TCGA	tumor	6.2787
TCGA.VQ.A91A.01	STAD	STAD_tumor_TCGA	tumor	6.5381
TCGA.VQ.A91Y.01	STAD	STAD_tumor_TCGA	tumor	6.3031
TCGA.VQ.A92D.01	STAD	STAD_tumor_TCGA	tumor	6.1591
TCGA.CG.5732.01	STAD	STAD_tumor_TCGA	tumor	5.8839
TCGA.D7.A6EZ.01	STAD	STAD_tumor_TCGA	tumor	6.4133
TCGA.HU.8243.01	STAD	STAD_tumor_TCGA	tumor	6.839
TCGA.MX.A663.01	STAD	STAD_tumor_TCGA	tumor	5.9343
TCGA.RD.A7BT.01	STAD	STAD_tumor_TCGA	tumor	6.8463
TCGA.VQ.A925.01	STAD	STAD_tumor_TCGA	tumor	6.3045
TCGA.BR.4294.01	STAD	STAD_tumor_TCGA	tumor	5.3064
TCGA.BR.6802.01	STAD	STAD_tumor_TCGA	tumor	7.275
TCGA.BR.7715.01	STAD	STAD_tumor_TCGA	tumor	6.8782
TCGA.BR.8362.01	STAD	STAD_tumor_TCGA	tumor	6.5749
TCGA.BR.A4QM.01	STAD	STAD_tumor_TCGA	tumor	5.142
TCGA.CD.8529.01	STAD	STAD_tumor_TCGA	tumor	6.4842
TCGA.D7.6521.01	STAD	STAD_tumor_TCGA	tumor	6.0297
TCGA.VQ.A8PC.01	STAD	STAD_tumor_TCGA	tumor	5.8143
TCGA.BR.7196.01	STAD	STAD_tumor_TCGA	tumor	6.2911
TCGA.D7.6820.01	STAD	STAD_tumor_TCGA	tumor	6.952
TCGA.IN.A6RJ.01	STAD	STAD_tumor_TCGA	tumor	6.2198
TCGA.BR.6706.01	STAD	STAD_tumor_TCGA	tumor	5.9031
TCGA.BR.7717.01	STAD	STAD_tumor_TCGA	tumor	5.9248
TCGA.BR.8372.01	STAD	STAD_tumor_TCGA	tumor	5.8714
TCGA.BR.A4J1.01	STAD	STAD_tumor_TCGA	tumor	5.8513
TCGA.D7.6817.01	STAD	STAD_tumor_TCGA	tumor	6.8247
TCGA.D7.A4YX.01	STAD	STAD_tumor_TCGA	tumor	5.931
TCGA.IN.AB1V.01	STAD	STAD_tumor_TCGA	tumor	6.086
TCGA.VQ.A8DU.01	STAD	STAD_tumor_TCGA	tumor	6.692
TCGA.VQ.A91S.01	STAD	STAD_tumor_TCGA	tumor	6.5429
TCGA.VQ.A94R.01	STAD	STAD_tumor_TCGA	tumor	6.4648
TCGA.B7.5818.01	STAD	STAD_tumor_TCGA	tumor	6.3158
TCGA.BR.7722.01	STAD	STAD_tumor_TCGA	tumor	5.5699
TCGA.BR.8371.01	STAD	STAD_tumor_TCGA	tumor	4.8895
TCGA.BR.8590.01	STAD	STAD_tumor_TCGA	tumor	6.067
TCGA.CD.A4MI.01	STAD	STAD_tumor_TCGA	tumor	4.5085
TCGA.D7.6527.01	STAD	STAD_tumor_TCGA	tumor	6.4353
TCGA.D7.A6F2.01	STAD	STAD_tumor_TCGA	tumor	5.6924
TCGA.FP.8211.01	STAD	STAD_tumor_TCGA	tumor	6.1559
TCGA.VQ.A8PH.01	STAD	STAD_tumor_TCGA	tumor	6.6133
TCGA.BR.8291.01	STAD	STAD_tumor_TCGA	tumor	6.2202
TCGA.BR.8484.01	STAD	STAD_tumor_TCGA	tumor	6.8318
TCGA.D7.A4YY.01	STAD	STAD_tumor_TCGA	tumor	5.7898
TCGA.HU.A4GN.01	STAD	STAD_tumor_TCGA	tumor	6.4622
TCGA.MX.A666.01	STAD	STAD_tumor_TCGA	tumor	6.6695
TCGA.VQ.A91Q.01	STAD	STAD_tumor_TCGA	tumor	6.7
TCGA.B7.A5TN.01	STAD	STAD_tumor_TCGA	tumor	6.4723
TCGA.BR.6563.01	STAD	STAD_tumor_TCGA	tumor	5.3093
TCGA.BR.7958.01	STAD	STAD_tumor_TCGA	tumor	6.0832
TCGA.CD.5813.01	STAD	STAD_tumor_TCGA	tumor	5.6285
TCGA.CD.A4MJ.01	STAD	STAD_tumor_TCGA	tumor	6.3728
TCGA.FP.A8CX.01	STAD	STAD_tumor_TCGA	tumor	5.7112
TCGA.BR.6455.01	STAD	STAD_tumor_TCGA	tumor	6.7706
TCGA.BR.7723.01	STAD	STAD_tumor_TCGA	tumor	7.2163
TCGA.BR.7959.01	STAD	STAD_tumor_TCGA	tumor	6.5607
TCGA.BR.8483.01	STAD	STAD_tumor_TCGA	tumor	6.1314
TCGA.BR.8676.01	STAD	STAD_tumor_TCGA	tumor	5.5214
TCGA.CD.8535.01	STAD	STAD_tumor_TCGA	tumor	7.8104
TCGA.CG.5724.01	STAD	STAD_tumor_TCGA	tumor	6.6229
TCGA.IN.7808.01	STAD	STAD_tumor_TCGA	tumor	4.7263
TCGA.VQ.A8E7.01	STAD	STAD_tumor_TCGA	tumor	6.3356
TCGA.VQ.AA6K.01	STAD	STAD_tumor_TCGA	tumor	5.8352
TCGA.BR.4357.01	STAD	STAD_tumor_TCGA	tumor	7.1449
TCGA.BR.6454.01	STAD	STAD_tumor_TCGA	tumor	6.6857
TCGA.BR.8297.01	STAD	STAD_tumor_TCGA	tumor	6.0745
TCGA.BR.A4IY.01	STAD	STAD_tumor_TCGA	tumor	6.388
TCGA.CD.A489.01	STAD	STAD_tumor_TCGA	tumor	5.8875
TCGA.CG.5717.01	STAD	STAD_tumor_TCGA	tumor	6.5406
TCGA.CG.5721.01	STAD	STAD_tumor_TCGA	tumor	6.8216
TCGA.D7.6522.01	STAD	STAD_tumor_TCGA	tumor	6.3279
TCGA.D7.6525.01	STAD	STAD_tumor_TCGA	tumor	6.8975
TCGA.VQ.A8PK.01	STAD	STAD_tumor_TCGA	tumor	7.7929
TCGA.VQ.A91V.01	STAD	STAD_tumor_TCGA	tumor	6.773
TCGA.BR.8289.01	STAD	STAD_tumor_TCGA	tumor	6.8668
TCGA.BR.A452.01	STAD	STAD_tumor_TCGA	tumor	6.7041
TCGA.CD.A48A.01	STAD	STAD_tumor_TCGA	tumor	5.3198
TCGA.CG.4436.01	STAD	STAD_tumor_TCGA	tumor	6.3338
TCGA.D7.8572.01	STAD	STAD_tumor_TCGA	tumor	6.6301
TCGA.D7.8573.01	STAD	STAD_tumor_TCGA	tumor	6.438
TCGA.D7.A747.01	STAD	STAD_tumor_TCGA	tumor	6.0568
TCGA.VQ.A8E2.01	STAD	STAD_tumor_TCGA	tumor	7.4152
TCGA.VQ.A94P.01	STAD	STAD_tumor_TCGA	tumor	5.2653
TCGA.VQ.AA6F.01	STAD	STAD_tumor_TCGA	tumor	5.9308
TCGA.BR.4187.01	STAD	STAD_tumor_TCGA	tumor	5.3985
TCGA.BR.8589.01	STAD	STAD_tumor_TCGA	tumor	6.278
TCGA.BR.A4J5.01	STAD	STAD_tumor_TCGA	tumor	5.3834
TCGA.CG.4438.01	STAD	STAD_tumor_TCGA	tumor	6.2538
TCGA.D7.A4YT.01	STAD	STAD_tumor_TCGA	tumor	6.345
TCGA.HU.8238.01	STAD	STAD_tumor_TCGA	tumor	5.3583
TCGA.HU.A4GD.01	STAD	STAD_tumor_TCGA	tumor	4.7997
TCGA.RD.A8MV.01	STAD	STAD_tumor_TCGA	tumor	5.8428
TCGA.VQ.A8PM.01	STAD	STAD_tumor_TCGA	tumor	5.7266
TCGA.VQ.AA6A.01	STAD	STAD_tumor_TCGA	tumor	7.0525
TCGA.BR.8367.01	STAD	STAD_tumor_TCGA	tumor	6.3427
TCGA.BR.8380.01	STAD	STAD_tumor_TCGA	tumor	5.7608
TCGA.BR.A4J9.01	STAD	STAD_tumor_TCGA	tumor	4.6899
TCGA.FP.A4BE.01	STAD	STAD_tumor_TCGA	tumor	6.8514
TCGA.BR.6453.01	STAD	STAD_tumor_TCGA	tumor	5.6212
TCGA.HU.A4G3.01	STAD	STAD_tumor_TCGA	tumor	5.4209
TCGA.D7.6520.01	STAD	STAD_tumor_TCGA	tumor	7.1986
TCGA.D7.6524.01	STAD	STAD_tumor_TCGA	tumor	6.609
TCGA.D7.6818.01	STAD	STAD_tumor_TCGA	tumor	7.6247
TCGA.VQ.A8PJ.01	STAD	STAD_tumor_TCGA	tumor	6.9556
TCGA.B7.A5TI.01	STAD	STAD_tumor_TCGA	tumor	6.3318
TCGA.BR.8682.01	STAD	STAD_tumor_TCGA	tumor	5.7372
TCGA.CD.8532.01	STAD	STAD_tumor_TCGA	tumor	6.0139
TCGA.3M.AB47.01	STAD	STAD_tumor_TCGA	tumor	5.3191
TCGA.B7.A5TK.01	STAD	STAD_tumor_TCGA	tumor	5.7769
TCGA.BR.4267.01	STAD	STAD_tumor_TCGA	tumor	6.0741
TCGA.BR.8381.01	STAD	STAD_tumor_TCGA	tumor	5.6938
TCGA.BR.A453.01	STAD	STAD_tumor_TCGA	tumor	5.284
TCGA.CD.8530.01	STAD	STAD_tumor_TCGA	tumor	5.7035
TCGA.R5.A7O7.01	STAD	STAD_tumor_TCGA	tumor	5.7043
TCGA.VQ.A8PX.01	STAD	STAD_tumor_TCGA	tumor	6.7129
TCGA.IN.7806.01	STAD	STAD_tumor_TCGA	tumor	6.5056
TCGA.BR.8286.01	STAD	STAD_tumor_TCGA	tumor	7.1008
TCGA.BR.A4J7.01	STAD	STAD_tumor_TCGA	tumor	4.9421
TCGA.CG.4472.01	STAD	STAD_tumor_TCGA	tumor	5.1591
TCGA.FP.8209.01	STAD	STAD_tumor_TCGA	tumor	5.9709
TCGA.VQ.A928.01	STAD	STAD_tumor_TCGA	tumor	6.5219
TCGA.CD.8533.01	STAD	STAD_tumor_TCGA	tumor	7.3032
TCGA.FP.8210.01	STAD	STAD_tumor_TCGA	tumor	6.0215
TCGA.VQ.A8DV.01	STAD	STAD_tumor_TCGA	tumor	5.3699
TCGA.VQ.AA6B.01	STAD	STAD_tumor_TCGA	tumor	5.8965
TCGA.BR.A4IV.01	STAD	STAD_tumor_TCGA	tumor	5.3544
TCGA.RD.A7BS.01	STAD	STAD_tumor_TCGA	tumor	5.842
TCGA.BR.8680.01	STAD	STAD_tumor_TCGA	tumor	7.2997
TCGA.CD.5799.01	STAD	STAD_tumor_TCGA	tumor	6.7698
TCGA.HU.A4G2.01	STAD	STAD_tumor_TCGA	tumor	5.0392
TCGA.IN.A6RI.01	STAD	STAD_tumor_TCGA	tumor	7.1706
TCGA.SW.A7EB.01	STAD	STAD_tumor_TCGA	tumor	5.9637
TCGA.D7.8570.01	STAD	STAD_tumor_TCGA	tumor	5.764
TCGA.BR.4279.01	STAD	STAD_tumor_TCGA	tumor	4.3342
TCGA.VQ.A8DT.01	STAD	STAD_tumor_TCGA	tumor	5.9928
TCGA.BR.6710.01	STAD	STAD_tumor_TCGA	tumor	4.7181
TCGA.CD.8534.01	STAD	STAD_tumor_TCGA	tumor	5.7099
TCGA.BR.A4J4.01	STAD	STAD_tumor_TCGA	tumor	5.8994
TCGA.VQ.AA69.01	STAD	STAD_tumor_TCGA	tumor	7.2026
TCGA.VQ.A91W.01	STAD	STAD_tumor_TCGA	tumor	6.0483
TCGA.HF.7132.01	STAD	STAD_tumor_TCGA	tumor	6.2634
TCGA.HF.7134.01	STAD	STAD_tumor_TCGA	tumor	6.6839
TCGA.HF.7136.01	STAD	STAD_tumor_TCGA	tumor	7.0775
TCGA.BR.8486.01	STAD	STAD_tumor_TCGA	tumor	6.3145
TCGA.CD.A4MH.01	STAD	STAD_tumor_TCGA	tumor	5.81
TCGA.MX.A5UJ.01	STAD	STAD_tumor_TCGA	tumor	6.5753
TCGA.BR.8368.01	STAD	STAD_tumor_TCGA	tumor	6.9404
TCGA.CD.8525.01	STAD	STAD_tumor_TCGA	tumor	7.3763
TCGA.HU.8604.01	STAD	STAD_tumor_TCGA	tumor	5.9681
TCGA.CG.4466.01	STAD	STAD_tumor_TCGA	tumor	5.8352
TCGA.BR.4253.01	STAD	STAD_tumor_TCGA	tumor	6.4527
TCGA.BR.8366.01	STAD	STAD_tumor_TCGA	tumor	5.8038
TCGA.RD.A8NB.01	STAD	STAD_tumor_TCGA	tumor	6.7046
TCGA.BR.4257.01	STAD	STAD_tumor_TCGA	tumor	5.9047
TCGA.CD.A48C.01	STAD	STAD_tumor_TCGA	tumor	6.1025
TCGA.D7.A6F0.01	STAD	STAD_tumor_TCGA	tumor	7.7264
TCGA.KB.A93H.01	STAD	STAD_tumor_TCGA	tumor	7.2972
TCGA.ZQ.A9CR.01	STAD	STAD_tumor_TCGA	tumor	6.0224
TCGA.BR.4280.01	STAD	STAD_tumor_TCGA	tumor	6.606
TCGA.BR.4368.01	STAD	STAD_tumor_TCGA	tumor	6.9936
TCGA.BR.6452.01	STAD	STAD_tumor_TCGA	tumor	7.6611
TCGA.CD.5803.01	STAD	STAD_tumor_TCGA	tumor	6.5331
TCGA.CG.5718.01	STAD	STAD_tumor_TCGA	tumor	6.6053
TCGA.IN.AB1X.01	STAD	STAD_tumor_TCGA	tumor	6.8662
TCGA.RD.A8N6.01	STAD	STAD_tumor_TCGA	tumor	5.5201
TCGA.HU.8244.01	STAD	STAD_tumor_TCGA	tumor	6.1881
TCGA.BR.4255.01	STAD	STAD_tumor_TCGA	tumor	5.42881
TCGA.BR.8369.01	STAD	STAD_tumor_TCGA	tumor	5.8558
TCGA.HU.A4GY.01	STAD	STAD_tumor_TCGA	tumor	5.2858
TCGA.BR.8060.01	STAD	STAD_tumor_TCGA	tumor	7.0216
TCGA.BR.A4QL.01	STAD	STAD_tumor_TCGA	tumor	6.2026
TCGA.CG.4301.01	STAD	STAD_tumor_TCGA	tumor	6.1751
TCGA.HF.A5NB.01	STAD	STAD_tumor_TCGA	tumor	6.0601
TCGA.BR.4362.01	STAD	STAD_tumor_TCGA	tumor	7.2254
TCGA.BR.4370.01	STAD	STAD_tumor_TCGA	tumor	6.9016
TCGA.BR.6456.01	STAD	STAD_tumor_TCGA	tumor	7.6637
TCGA.BR.8677.01	STAD	STAD_tumor_TCGA	tumor	6.52
TCGA.BR.4292.01	STAD	STAD_tumor_TCGA	tumor	6.7828
TCGA.BR.8363.01	STAD	STAD_tumor_TCGA	tumor	7.1724
TCGA.CD.8526.01	STAD	STAD_tumor_TCGA	tumor	6.3
TCGA.IN.A7NT.01	STAD	STAD_tumor_TCGA	tumor	7.5022
TCGA.BR.8080.01	STAD	STAD_tumor_TCGA	tumor	6.0555
TCGA.BR.8284.01	STAD	STAD_tumor_TCGA	tumor	6.2899
TCGA.BR.A4PD.01	STAD	STAD_tumor_TCGA	tumor	7.4435
TCGA.CD.8527.01	STAD	STAD_tumor_TCGA	tumor	7.5539
TCGA.CG.4462.01	STAD	STAD_tumor_TCGA	tumor	6.2636
TCGA.D7.A6EX.01	STAD	STAD_tumor_TCGA	tumor	5.6014
TCGA.D7.A6EY.01	STAD	STAD_tumor_TCGA	tumor	6.4846
TCGA.HU.A4H6.01	STAD	STAD_tumor_TCGA	tumor	5.2987
TCGA.VQ.A8P8.01	STAD	STAD_tumor_TCGA	tumor	5.8578
TCGA.VQ.A8PU.01	STAD	STAD_tumor_TCGA	tumor	6.4308
TCGA.BR.4371.01	STAD	STAD_tumor_TCGA	tumor	6.3111
TCGA.BR.8081.01	STAD	STAD_tumor_TCGA	tumor	6.8889
TCGA.BR.8361.01	STAD	STAD_tumor_TCGA	tumor	6.6682
TCGA.BR.A4J8.01	STAD	STAD_tumor_TCGA	tumor	5.2502
TCGA.D7.A6EV.01	STAD	STAD_tumor_TCGA	tumor	6.6363
TCGA.EQ.8122.01	STAD	STAD_tumor_TCGA	tumor	6.3054
TCGA.HJ.7597.01	STAD	STAD_tumor_TCGA	tumor	7.1342
TCGA.HU.A4G8.01	STAD	STAD_tumor_TCGA	tumor	7.3087
TCGA.HU.A4GT.01	STAD	STAD_tumor_TCGA	tumor	6.2904
TCGA.BR.8078.01	STAD	STAD_tumor_TCGA	tumor	6.959
TCGA.BR.8365.01	STAD	STAD_tumor_TCGA	tumor	5.8455
TCGA.BR.A4CR.01	STAD	STAD_tumor_TCGA	tumor	6.3245
TCGA.BR.A4QI.01	STAD	STAD_tumor_TCGA	tumor	5.0721
TCGA.D7.6528.01	STAD	STAD_tumor_TCGA	tumor	7.4893
TCGA.D7.6815.01	STAD	STAD_tumor_TCGA	tumor	6.1912
TCGA.HU.A4GX.01	STAD	STAD_tumor_TCGA	tumor	5.8084
TCGA.R5.A7ZR.01	STAD	STAD_tumor_TCGA	tumor	7.3929
TCGA.BR.7704.01	STAD	STAD_tumor_TCGA	tumor	7.3754
TCGA.BR.7707.01	STAD	STAD_tumor_TCGA	tumor	6.806
TCGA.BR.A4J6.01	STAD	STAD_tumor_TCGA	tumor	5.4446
TCGA.CG.4465.01	STAD	STAD_tumor_TCGA	tumor	6.5065
TCGA.D7.A4YV.01	STAD	STAD_tumor_TCGA	tumor	6.3569
TCGA.BR.6705.01	STAD	STAD_tumor_TCGA	tumor	6.2046
TCGA.BR.8485.01	STAD	STAD_tumor_TCGA	tumor	6.6234
TCGA.BR.A4PE.01	STAD	STAD_tumor_TCGA	tumor	6.4854
TCGA.CG.4440.01	STAD	STAD_tumor_TCGA	tumor	6.4138
TCGA.RD.A7BW.01	STAD	STAD_tumor_TCGA	tumor	5.7698
TCGA.BR.8382.01	STAD	STAD_tumor_TCGA	tumor	5.9647
TCGA.BR.8687.01	STAD	STAD_tumor_TCGA	tumor	6.5857
TCGA.CG.4474.01	STAD	STAD_tumor_TCGA	tumor	5.9892
TCGA.CG.5722.01	STAD	STAD_tumor_TCGA	tumor	5.8883
TCGA.D7.6526.01	STAD	STAD_tumor_TCGA	tumor	7.244
TCGA.HU.A4G9.01	STAD	STAD_tumor_TCGA	tumor	6.3098
TCGA.VQ.A91E.01	STAD	STAD_tumor_TCGA	tumor	6.8823
TCGA.VQ.A91Z.01	STAD	STAD_tumor_TCGA	tumor	6.674
TCGA.BR.4201.01	STAD	STAD_tumor_TCGA	tumor	5.9232
TCGA.BR.4361.01	STAD	STAD_tumor_TCGA	tumor	6.6689
TCGA.CD.8531.01	STAD	STAD_tumor_TCGA	tumor	6.0936
TCGA.CG.4460.01	STAD	STAD_tumor_TCGA	tumor	5.6453
TCGA.D7.8579.01	STAD	STAD_tumor_TCGA	tumor	6.0997
TCGA.R5.A7ZE.01	STAD	STAD_tumor_TCGA	tumor	6.8361
TCGA.BR.8373.01	STAD	STAD_tumor_TCGA	tumor	7.6408
TCGA.R5.A7ZF.01	STAD	STAD_tumor_TCGA	tumor	7.3085
TCGA.VQ.A8PB.01	STAD	STAD_tumor_TCGA	tumor	5.94
TCGA.BR.6566.01	STAD	STAD_tumor_TCGA	tumor	6.4756
TCGA.BR.6852.01	STAD	STAD_tumor_TCGA	tumor	7.164
TCGA.BR.8487.01	STAD	STAD_tumor_TCGA	tumor	6.5038
TCGA.D7.6519.01	STAD	STAD_tumor_TCGA	tumor	7.3396
TCGA.IN.A7NR.01	STAD	STAD_tumor_TCGA	tumor	5.9614
TCGA.BR.8592.01	STAD	STAD_tumor_TCGA	tumor	5.5723
TCGA.BR.8679.01	STAD	STAD_tumor_TCGA	tumor	6.2965
TCGA.RD.A8N9.01	STAD	STAD_tumor_TCGA	tumor	6.329
TCGA.BR.7716.01	STAD	STAD_tumor_TCGA	tumor	7.1072
TCGA.HU.A4GP.01	STAD	STAD_tumor_TCGA	tumor	6.4328
TCGA.CD.8524.01	STAD	STAD_tumor_TCGA	tumor	6.0237
TCGA.D7.A74A.01	STAD	STAD_tumor_TCGA	tumor	5.1069
TCGA.SW.A7EA.01	STAD	STAD_tumor_TCGA	tumor	6.7463
TCGA.BR.4363.01	STAD	STAD_tumor_TCGA	tumor	6.9973
TCGA.BR.8295.01	STAD	STAD_tumor_TCGA	tumor	6.1518
TCGA.D7.A4Z0.01	STAD	STAD_tumor_TCGA	tumor	5.8721
TCGA.HU.A4GJ.01	STAD	STAD_tumor_TCGA	tumor	5.2262
TCGA.RD.A8N2.01	STAD	STAD_tumor_TCGA	tumor	4.9012
TCGA.VQ.A91N.01	STAD	STAD_tumor_TCGA	tumor	6.3056
TCGA.BR.8077.01	STAD	STAD_tumor_TCGA	tumor	5.9535
TCGA.BR.8296.01	STAD	STAD_tumor_TCGA	tumor	6.4749
TCGA.CG.4477.01	STAD	STAD_tumor_TCGA	tumor	6.234
TCGA.HU.8602.01	STAD	STAD_tumor_TCGA	tumor	7.8855
TCGA.HU.A4H2.01	STAD	STAD_tumor_TCGA	tumor	6.6314
TCGA.RD.A8N4.01	STAD	STAD_tumor_TCGA	tumor	5.3388
TCGA.BR.6458.01	STAD	STAD_tumor_TCGA	tumor	6.5896
TCGA.BR.6709.01	STAD	STAD_tumor_TCGA	tumor	6.6232
TCGA.HU.A4H3.01	STAD	STAD_tumor_TCGA	tumor	6.644
TCGA.BR.8588.01	STAD	STAD_tumor_TCGA	tumor	6.1993
TCGA.BR.6803.01	STAD	STAD_tumor_TCGA	tumor	5.8839
TCGA.BR.8690.01	STAD	STAD_tumor_TCGA	tumor	5.4047
TCGA.CG.5719.01	STAD	STAD_tumor_TCGA	tumor	5.7811
TCGA.D7.8576.01	STAD	STAD_tumor_TCGA	tumor	6.9807
TCGA.KB.A6F7.01	STAD	STAD_tumor_TCGA	tumor	7.5182
TCGA.BR.8058.01	STAD	STAD_tumor_TCGA	tumor	7.0463
TCGA.BR.A44T.01	STAD	STAD_tumor_TCGA	tumor	4.891
TCGA.D7.5577.01	STAD	STAD_tumor_TCGA	tumor	6.1849
TCGA.HU.A4H4.01	STAD	STAD_tumor_TCGA	tumor	5.4842
TCGA.RD.A8N0.01	STAD	STAD_tumor_TCGA	tumor	4.8665
TCGA.VQ.AA68.01	STAD	STAD_tumor_TCGA	tumor	6.1029
TCGA.VQ.AA6D.01	STAD	STAD_tumor_TCGA	tumor	6.7972
TCGA.B7.5816.01	STAD	STAD_tumor_TCGA	tumor	6.9112
TCGA.CD.5800.01	STAD	STAD_tumor_TCGA	tumor	8.0646
TCGA.BR.7957.01	STAD	STAD_tumor_TCGA	tumor	7.0035
TCGA.VQ.A8PQ.01	STAD	STAD_tumor_TCGA	tumor	6.0231
TCGA.BR.6564.01	STAD	STAD_tumor_TCGA	tumor	5.4353
TCGA.BR.A4IZ.01	STAD	STAD_tumor_TCGA	tumor	6.2557
TCGA.R5.A7ZI.01	STAD	STAD_tumor_TCGA	tumor	6.8529
TCGA.CD.8528.01	STAD	STAD_tumor_TCGA	tumor	7.2389
TCGA.BR.8364.01	STAD	STAD_tumor_TCGA	tumor	6.0888
TCGA.D7.A748.01	STAD	STAD_tumor_TCGA	tumor	5.8004
TCGA.BR.A4IU.01	STAD	STAD_tumor_TCGA	tumor	5.9919
TCGA.HF.7131.01	STAD	STAD_tumor_TCGA	tumor	6.5149
TCGA.HF.7133.01	STAD	STAD_tumor_TCGA	tumor	7.5191
TCGA.MB.A5Y9.01	SARC	SARC_tumor_TCGA	tumor	5.8207
TCGA.X6.A7W8.01	SARC	SARC_tumor_TCGA	tumor	6.4211
TCGA.FX.A3TO.01	SARC	SARC_tumor_TCGA	tumor	6.8941
TCGA.DX.A8BH.01	SARC	SARC_tumor_TCGA	tumor	6.3663
TCGA.DX.AB36.01	SARC	SARC_tumor_TCGA	tumor	6.619
TCGA.DX.A8BP.01	SARC	SARC_tumor_TCGA	tumor	6.2062
TCGA.DX.A3U9.01	SARC	SARC_tumor_TCGA	tumor	6.8254
TCGA.DX.A1KU.01	SARC	SARC_tumor_TCGA	tumor	5.9496
TCGA.DX.A23U.01	SARC	SARC_tumor_TCGA	tumor	6.0239
TCGA.DX.AB2V.01	SARC	SARC_tumor_TCGA	tumor	6.4647
TCGA.DX.A23Y.01	SARC	SARC_tumor_TCGA	tumor	6.044
TCGA.DX.A6B8.01	SARC	SARC_tumor_TCGA	tumor	7.924
TCGA.DX.AB3A.01	SARC	SARC_tumor_TCGA	tumor	6.4261
TCGA.IF.A4AJ.01	SARC	SARC_tumor_TCGA	tumor	7.0018
TCGA.DX.A3M1.01	SARC	SARC_tumor_TCGA	tumor	7.0335
TCGA.DX.AB2P.01	SARC	SARC_tumor_TCGA	tumor	6.8276
TCGA.DX.A1L2.01	SARC	SARC_tumor_TCGA	tumor	6.0045
TCGA.SG.A849.01	SARC	SARC_tumor_TCGA	tumor	6.4443
TCGA.DX.A6BE.01	SARC	SARC_tumor_TCGA	tumor	5.5034
TCGA.DX.A8BJ.01	SARC	SARC_tumor_TCGA	tumor	6.9592
TCGA.QQ.A5V9.01	SARC	SARC_tumor_TCGA	tumor	5.6622
TCGA.3B.A9HO.01	SARC	SARC_tumor_TCGA	tumor	6.0807
TCGA.DX.A6YR.01	SARC	SARC_tumor_TCGA	tumor	6.6928
TCGA.HB.A3YV.01	SARC	SARC_tumor_TCGA	tumor	7.4864
TCGA.QC.A7B5.01	SARC	SARC_tumor_TCGA	tumor	6.1691
TCGA.DX.A23Z.01	SARC	SARC_tumor_TCGA	tumor	6.28
TCGA.DX.A6BB.01	SARC	SARC_tumor_TCGA	tumor	5.9407
TCGA.DX.A6YV.01	SARC	SARC_tumor_TCGA	tumor	7.427
TCGA.X6.A7WC.01	SARC	SARC_tumor_TCGA	tumor	6.743
TCGA.PC.A5DM.01	SARC	SARC_tumor_TCGA	tumor	7.0143
TCGA.DX.A7EQ.01	SARC	SARC_tumor_TCGA	tumor	6.202
TCGA.DX.AATS.01	SARC	SARC_tumor_TCGA	tumor	7.5878
TCGA.DX.A7ET.01	SARC	SARC_tumor_TCGA	tumor	6.4887
TCGA.VT.AB3D.01	SARC	SARC_tumor_TCGA	tumor	6.3416
TCGA.QQ.A8VF.01	SARC	SARC_tumor_TCGA	tumor	6.8288
TCGA.WK.A8XX.01	SARC	SARC_tumor_TCGA	tumor	6.6874
TCGA.DX.A7ER.01	SARC	SARC_tumor_TCGA	tumor	5.9341
TCGA.3B.A9HJ.01	SARC	SARC_tumor_TCGA	tumor	4.7138
TCGA.QC.A6FX.01	SARC	SARC_tumor_TCGA	tumor	8.0769
TCGA.3B.A9HL.01	SARC	SARC_tumor_TCGA	tumor	6.5615
TCGA.DX.A1KW.01	SARC	SARC_tumor_TCGA	tumor	6.5896
TCGA.DX.A3U7.01	SARC	SARC_tumor_TCGA	tumor	6.7558
TCGA.K1.A6RV.01	SARC	SARC_tumor_TCGA	tumor	6.6786
TCGA.PC.A5DL.01	SARC	SARC_tumor_TCGA	tumor	6.332
TCGA.3B.A9HZ.01	SARC	SARC_tumor_TCGA	tumor	6.7301
TCGA.3R.A8YX.01	SARC	SARC_tumor_TCGA	tumor	5.8217
TCGA.DX.A1KY.01	SARC	SARC_tumor_TCGA	tumor	7.1743
TCGA.DX.A1KZ.01	SARC	SARC_tumor_TCGA	tumor	6.0683
TCGA.DX.A3LY.01	SARC	SARC_tumor_TCGA	tumor	6.1344
TCGA.VT.A80G.01	SARC	SARC_tumor_TCGA	tumor	7.1792
TCGA.DX.A48K.01	SARC	SARC_tumor_TCGA	tumor	6.1914
TCGA.DX.AB35.01	SARC	SARC_tumor_TCGA	tumor	7.0454
TCGA.DX.A8BQ.01	SARC	SARC_tumor_TCGA	tumor	5.6537
TCGA.MB.A5YA.01	SARC	SARC_tumor_TCGA	tumor	5.2536
TCGA.PC.A5DK.01	SARC	SARC_tumor_TCGA	tumor	5.6074
TCGA.3B.A9I3.01	SARC	SARC_tumor_TCGA	tumor	6.4445
TCGA.DX.A3LT.01	SARC	SARC_tumor_TCGA	tumor	6.3367
TCGA.DX.A2J0.01	SARC	SARC_tumor_TCGA	tumor	6.7621
TCGA.DX.A6YS.01	SARC	SARC_tumor_TCGA	tumor	7.1187
TCGA.DX.A7EM.01	SARC	SARC_tumor_TCGA	tumor	7.55
TCGA.3B.A9HS.01	SARC	SARC_tumor_TCGA	tumor	6.7129
TCGA.DX.A1L1.01	SARC	SARC_tumor_TCGA	tumor	6.4756
TCGA.DX.A1L4.01	SARC	SARC_tumor_TCGA	tumor	5.6671
TCGA.DX.A2IZ.01	SARC	SARC_tumor_TCGA	tumor	5.5868
TCGA.DX.A2J4.01	SARC	SARC_tumor_TCGA	tumor	4.7143
TCGA.DX.A3LU.01	SARC	SARC_tumor_TCGA	tumor	5.7679
TCGA.DX.A8BM.01	SARC	SARC_tumor_TCGA	tumor	7.6322
TCGA.DX.AB2E.01	SARC	SARC_tumor_TCGA	tumor	6.8286
TCGA.DX.A3M2.01	SARC	SARC_tumor_TCGA	tumor	6.1422
TCGA.DX.A6YZ.01	SARC	SARC_tumor_TCGA	tumor	6.621
TCGA.DX.A8BL.01	SARC	SARC_tumor_TCGA	tumor	6.8094
TCGA.DX.A1L0.01	SARC	SARC_tumor_TCGA	tumor	6.9514
TCGA.DX.A8BU.01	SARC	SARC_tumor_TCGA	tumor	7.0663
TCGA.DX.A48U.01	SARC	SARC_tumor_TCGA	tumor	5.6982
TCGA.DX.A8BV.01	SARC	SARC_tumor_TCGA	tumor	6.6062
TCGA.WK.A8XQ.01	SARC	SARC_tumor_TCGA	tumor	6.6193
TCGA.DX.A3UD.01	SARC	SARC_tumor_TCGA	tumor	6.1131
TCGA.QQ.A8VD.01	SARC	SARC_tumor_TCGA	tumor	5.8225
TCGA.X6.A8C2.01	SARC	SARC_tumor_TCGA	tumor	7.3184
TCGA.DX.A6B7.01	SARC	SARC_tumor_TCGA	tumor	5.9175
TCGA.X6.A8C6.01	SARC	SARC_tumor_TCGA	tumor	6.7067
TCGA.X9.A973.01	SARC	SARC_tumor_TCGA	tumor	6.418
TCGA.DX.A3UB.01	SARC	SARC_tumor_TCGA	tumor	5.8148
TCGA.FX.A3NJ.01	SARC	SARC_tumor_TCGA	tumor	5.4919
TCGA.IE.A4EK.01	SARC	SARC_tumor_TCGA	tumor	5.9718
TCGA.3B.A9HT.01	SARC	SARC_tumor_TCGA	tumor	6.4825
TCGA.DX.A2J1.01	SARC	SARC_tumor_TCGA	tumor	5.5644
TCGA.FX.A3NK.01	SARC	SARC_tumor_TCGA	tumor	6.1954
TCGA.DX.A3U5.01	SARC	SARC_tumor_TCGA	tumor	6.2976
TCGA.DX.A8BX.01	SARC	SARC_tumor_TCGA	tumor	6.7621
TCGA.QQ.A5VD.01	SARC	SARC_tumor_TCGA	tumor	5.8079
TCGA.QQ.A8VG.01	SARC	SARC_tumor_TCGA	tumor	6.3299
TCGA.RN.AAAQ.01	SARC	SARC_tumor_TCGA	tumor	7.9485
TCGA.DX.A240.01	SARC	SARC_tumor_TCGA	tumor	6.275
TCGA.DX.A6BG.01	SARC	SARC_tumor_TCGA	tumor	5.7682
TCGA.DX.AB32.01	SARC	SARC_tumor_TCGA	tumor	6.2899
TCGA.SI.A71P.01	SARC	SARC_tumor_TCGA	tumor	6.8276
TCGA.3B.A9HY.01	SARC	SARC_tumor_TCGA	tumor	6.243
TCGA.MB.A8JK.01	SARC	SARC_tumor_TCGA	tumor	6.7801
TCGA.K1.A6RT.01	SARC	SARC_tumor_TCGA	tumor	6.4321
TCGA.DX.A48N.01	SARC	SARC_tumor_TCGA	tumor	6.3098
TCGA.SG.A6Z4.01	SARC	SARC_tumor_TCGA	tumor	6.8564
TCGA.DX.A48J.01	SARC	SARC_tumor_TCGA	tumor	5.2445
TCGA.DX.A3LW.01	SARC	SARC_tumor_TCGA	tumor	6.3062
TCGA.DX.A3U8.01	SARC	SARC_tumor_TCGA	tumor	6.643
TCGA.IE.A3OV.01	SARC	SARC_tumor_TCGA	tumor	6.4547
TCGA.K1.A3PO.01	SARC	SARC_tumor_TCGA	tumor	5.9189
TCGA.QQ.A5V2.01	SARC	SARC_tumor_TCGA	tumor	5.6688
TCGA.DX.A48R.01	SARC	SARC_tumor_TCGA	tumor	6.6288
TCGA.Z4.A9VC.01	SARC	SARC_tumor_TCGA	tumor	6.0184
TCGA.DX.AB2G.01	SARC	SARC_tumor_TCGA	tumor	5.6662
TCGA.DX.AB2L.01	SARC	SARC_tumor_TCGA	tumor	5.9031
TCGA.DX.A6BH.01	SARC	SARC_tumor_TCGA	tumor	5.6112
TCGA.3B.A9I0.01	SARC	SARC_tumor_TCGA	tumor	5.9324
TCGA.SI.A71O.01	SARC	SARC_tumor_TCGA	tumor	6.2275
TCGA.MJ.A850.01	SARC	SARC_tumor_TCGA	tumor	5.8141
TCGA.DX.AB3C.01	SARC	SARC_tumor_TCGA	tumor	6.5989
TCGA.UE.A6QU.01	SARC	SARC_tumor_TCGA	tumor	7.4433
TCGA.X6.A7WA.01	SARC	SARC_tumor_TCGA	tumor	7.2769
TCGA.DX.A7EF.01	SARC	SARC_tumor_TCGA	tumor	6.7373
TCGA.DX.AB2Z.01	SARC	SARC_tumor_TCGA	tumor	6.6366
TCGA.DX.A6YQ.01	SARC	SARC_tumor_TCGA	tumor	6.6119
TCGA.IE.A4EJ.01	SARC	SARC_tumor_TCGA	tumor	7.6214
TCGA.DX.A8BG.01	SARC	SARC_tumor_TCGA	tumor	6.9118
TCGA.DX.A6BF.01	SARC	SARC_tumor_TCGA	tumor	6.4866
TCGA.DX.A6Z2.01	SARC	SARC_tumor_TCGA	tumor	6.1918
TCGA.IF.A4AK.01	SARC	SARC_tumor_TCGA	tumor	7.2001
TCGA.DX.AB2H.01	SARC	SARC_tumor_TCGA	tumor	6.1938
TCGA.SI.AA8B.01	SARC	SARC_tumor_TCGA	tumor	6.6545
TCGA.DX.A7EU.01	SARC	SARC_tumor_TCGA	tumor	6.718
TCGA.DX.A3LS.01	SARC	SARC_tumor_TCGA	tumor	5.9973
TCGA.DX.A6Z0.01	SARC	SARC_tumor_TCGA	tumor	7.0715
TCGA.DX.A7EI.01	SARC	SARC_tumor_TCGA	tumor	7.7863
TCGA.DX.A8BN.01	SARC	SARC_tumor_TCGA	tumor	7.3503
[truncated: 16,104 more rows]
